# Supplementary material for: Complex origins of chloroplast membranes with photosynthetic machineries: multiple transfers of genes from divergent organisms at different times or a single endosymbiotic event?
Source: PubMed Central journal article supplement (PMC6946739; doi:10.1007/s10265-019-01157-z), 2019-12-06

## Journal of Plant Research

### Online Resources

Complex origins of chloroplast membranes with photosynthetic machineries: Multiple transfers of genes from divergent organisms at different times or a single endosymbiotic event?

Naoki Sato

University of Tokyo

naokisat@bio.c.u-tokyo.ac.jp

### Online Resource 3. Phylogenetic trees of enzymes involved in chloroplast fatty acid synthesis.

AccA, B, C, and D, subunits of acetyl-CoA carboxylase; ACP, acyl carrier protein; FabBF, 3-oxoacyl-ACP synthase KAS I/II; FabD, malonyl transferase; FabG, 3-oxoacyl-ACP reductase; FabI, enoyl-ACP reductase; FabZ, 3-hydroxylacyl-ACP dehydratase; FadA, palmitoyl phosphatidylglycerol 3-*trans* desaturase; KAS III, 3-oxoacyl-ACP synthase acting in the initial step; SAD, stearyl-ACP desaturase. An additional tree of desaturases, which was reconstructed using the data in [Sato and Moriyama \(2007\)](#), is also presented at the end of file. Locate the enzymes in the biosynthetic pathway in [Fig. 1 panels A and B](#).

AccA (BI/ML)

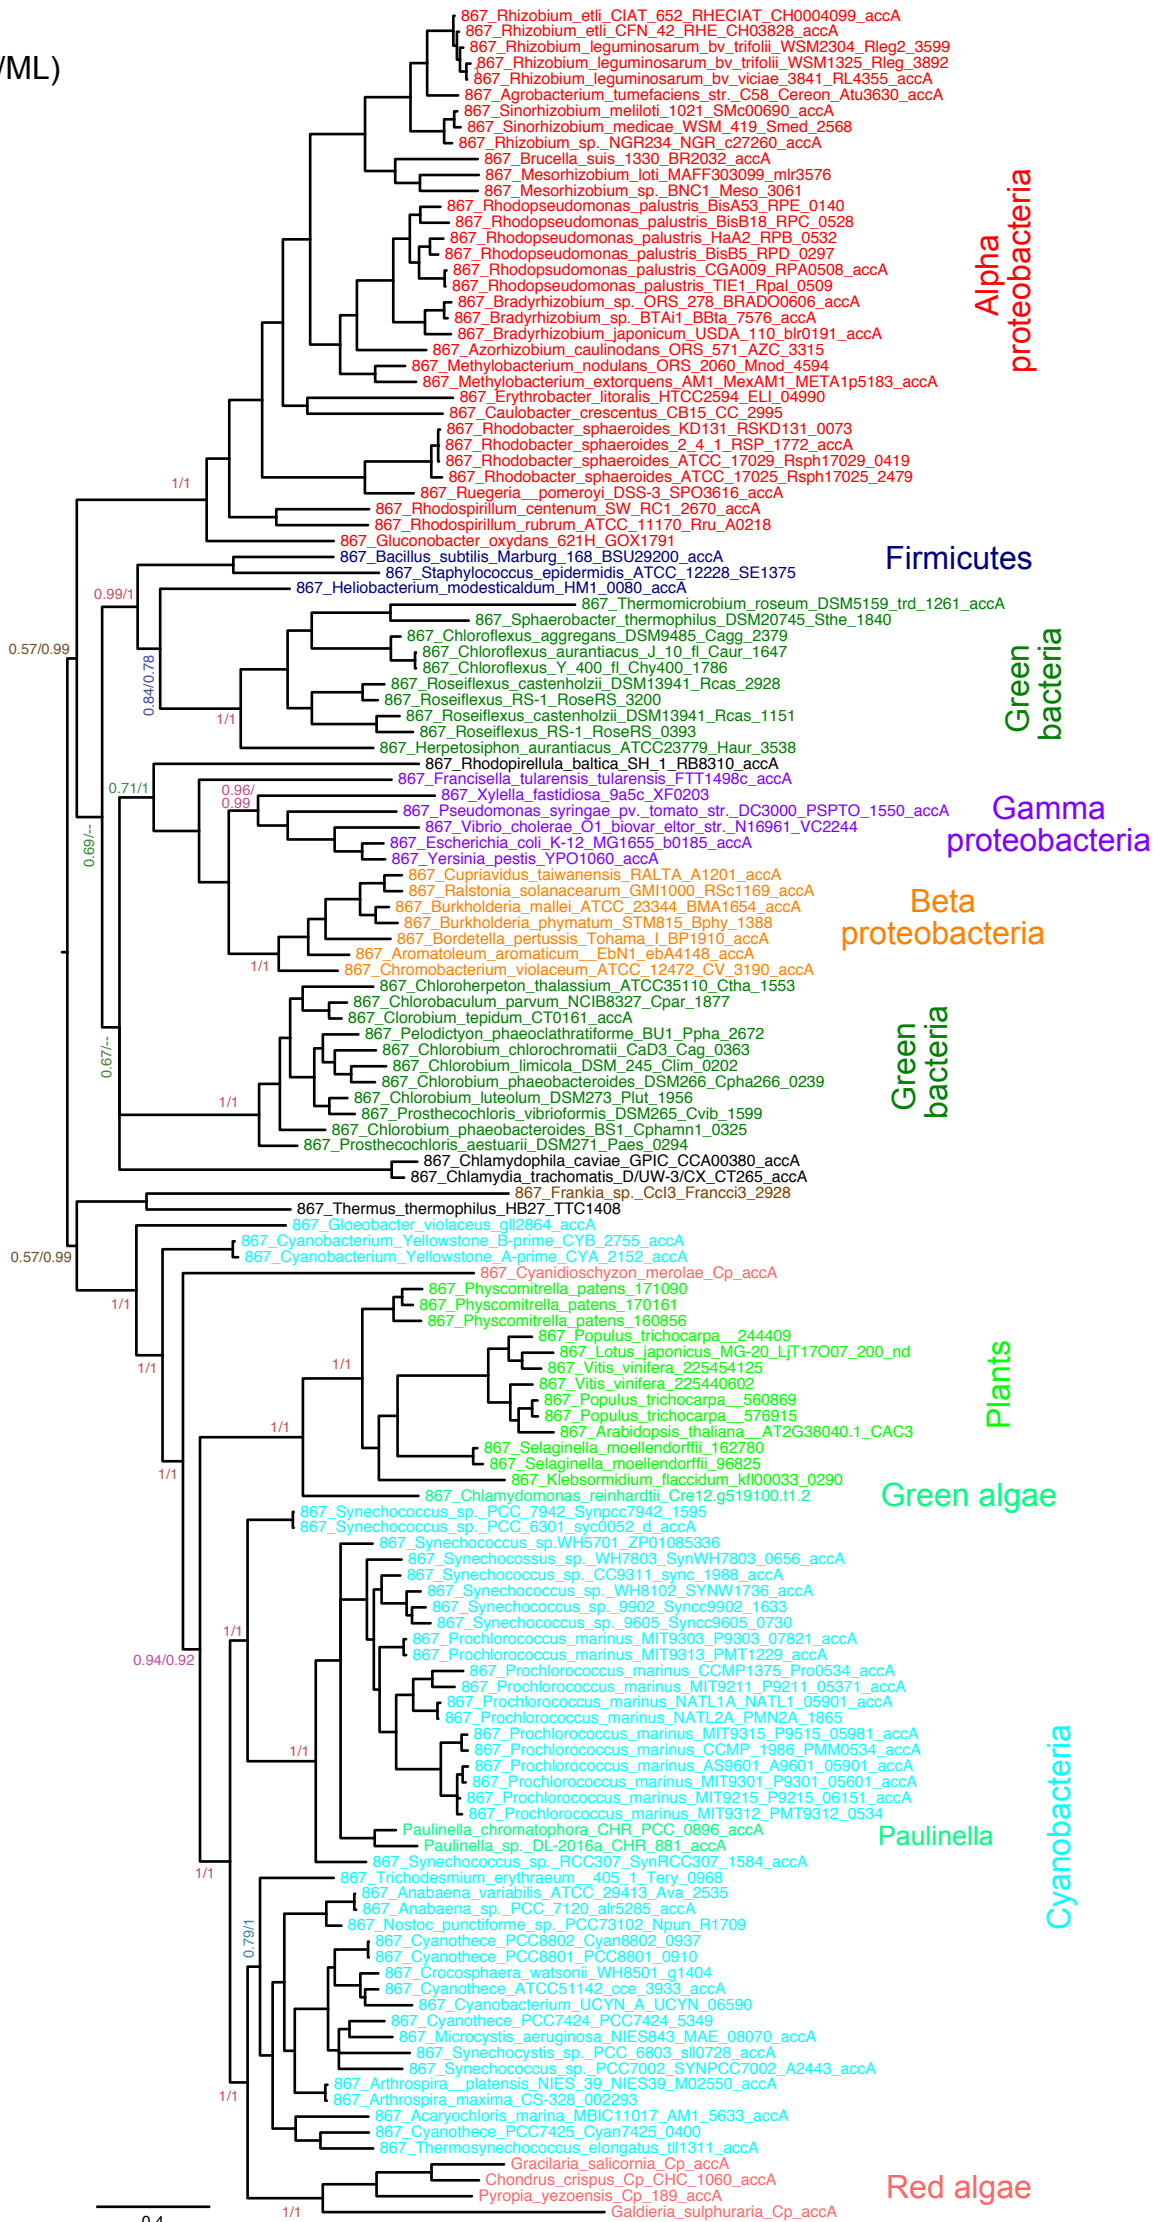



AccC (BI/ML)

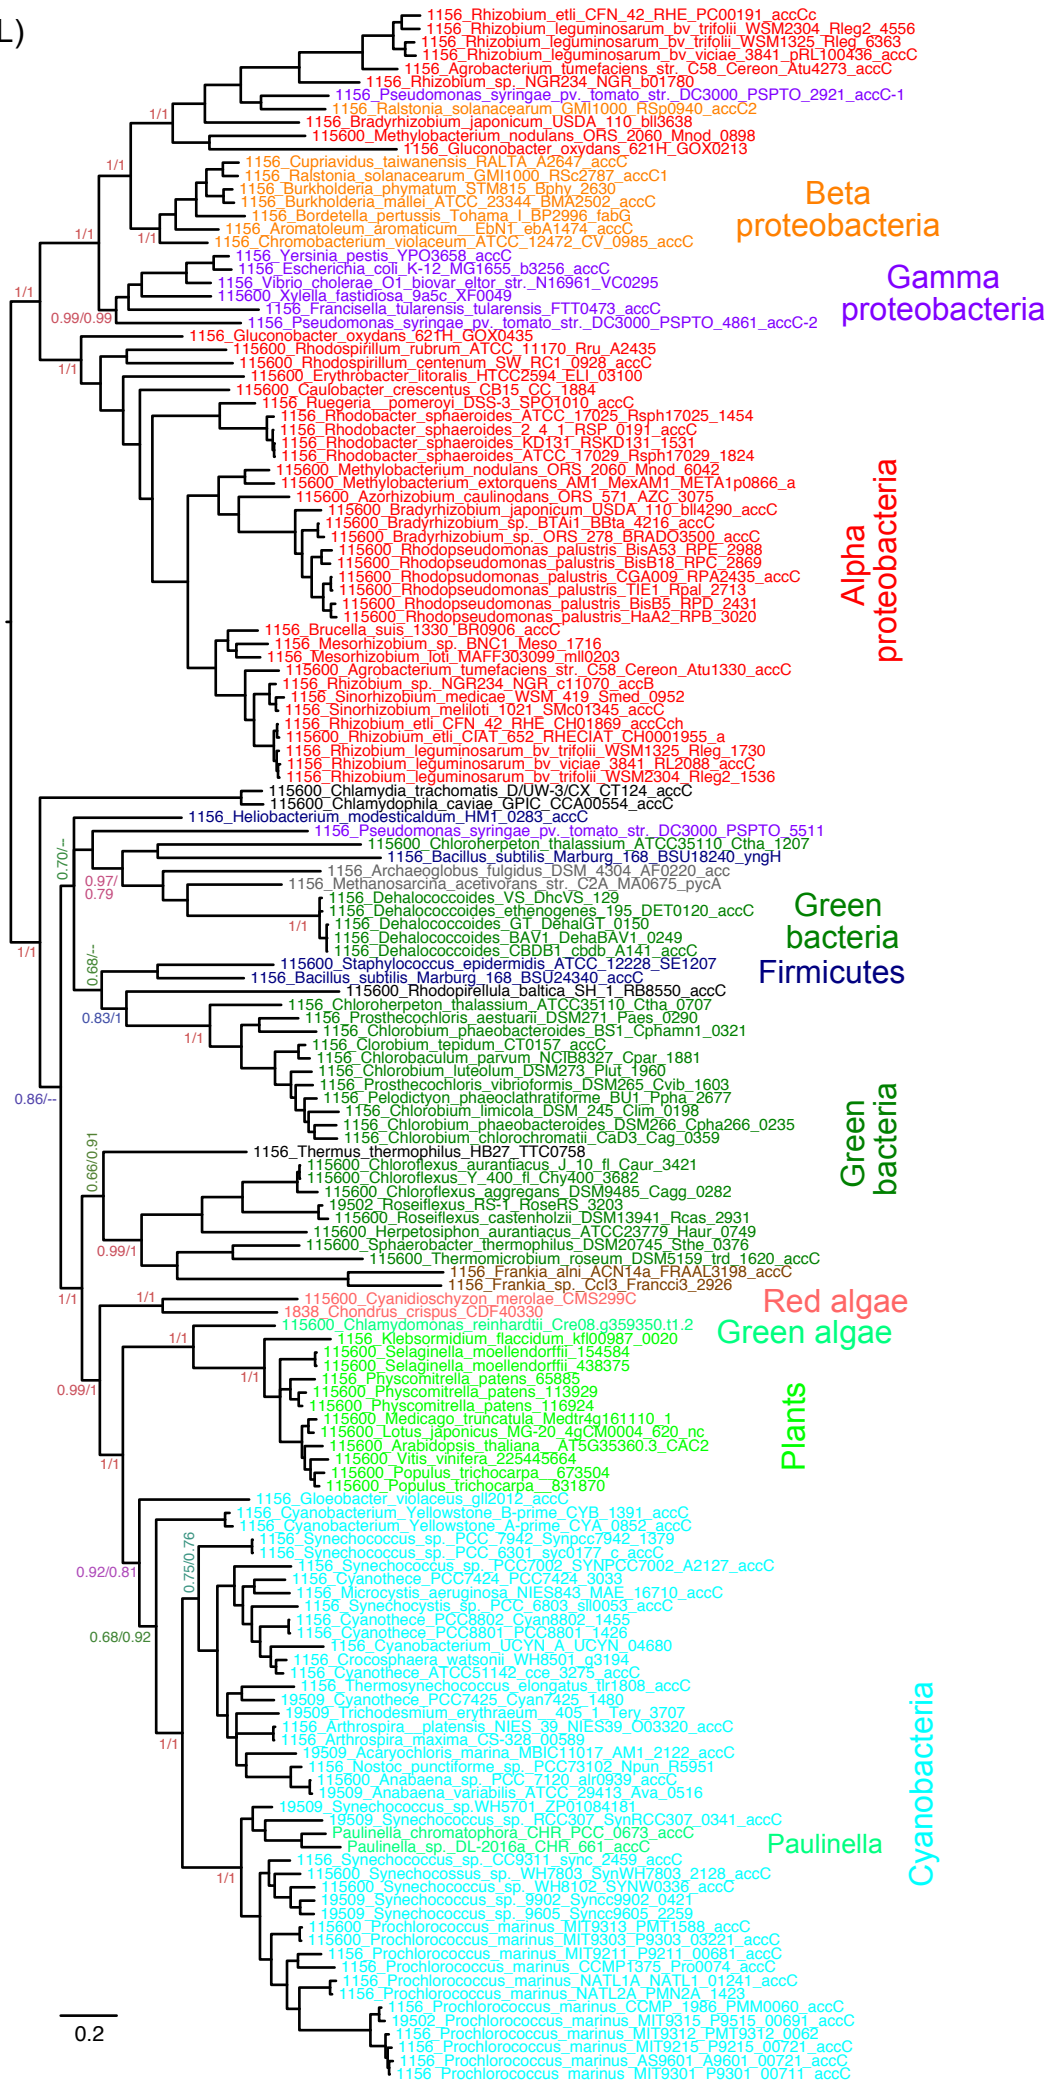

AccD (BI/ML)

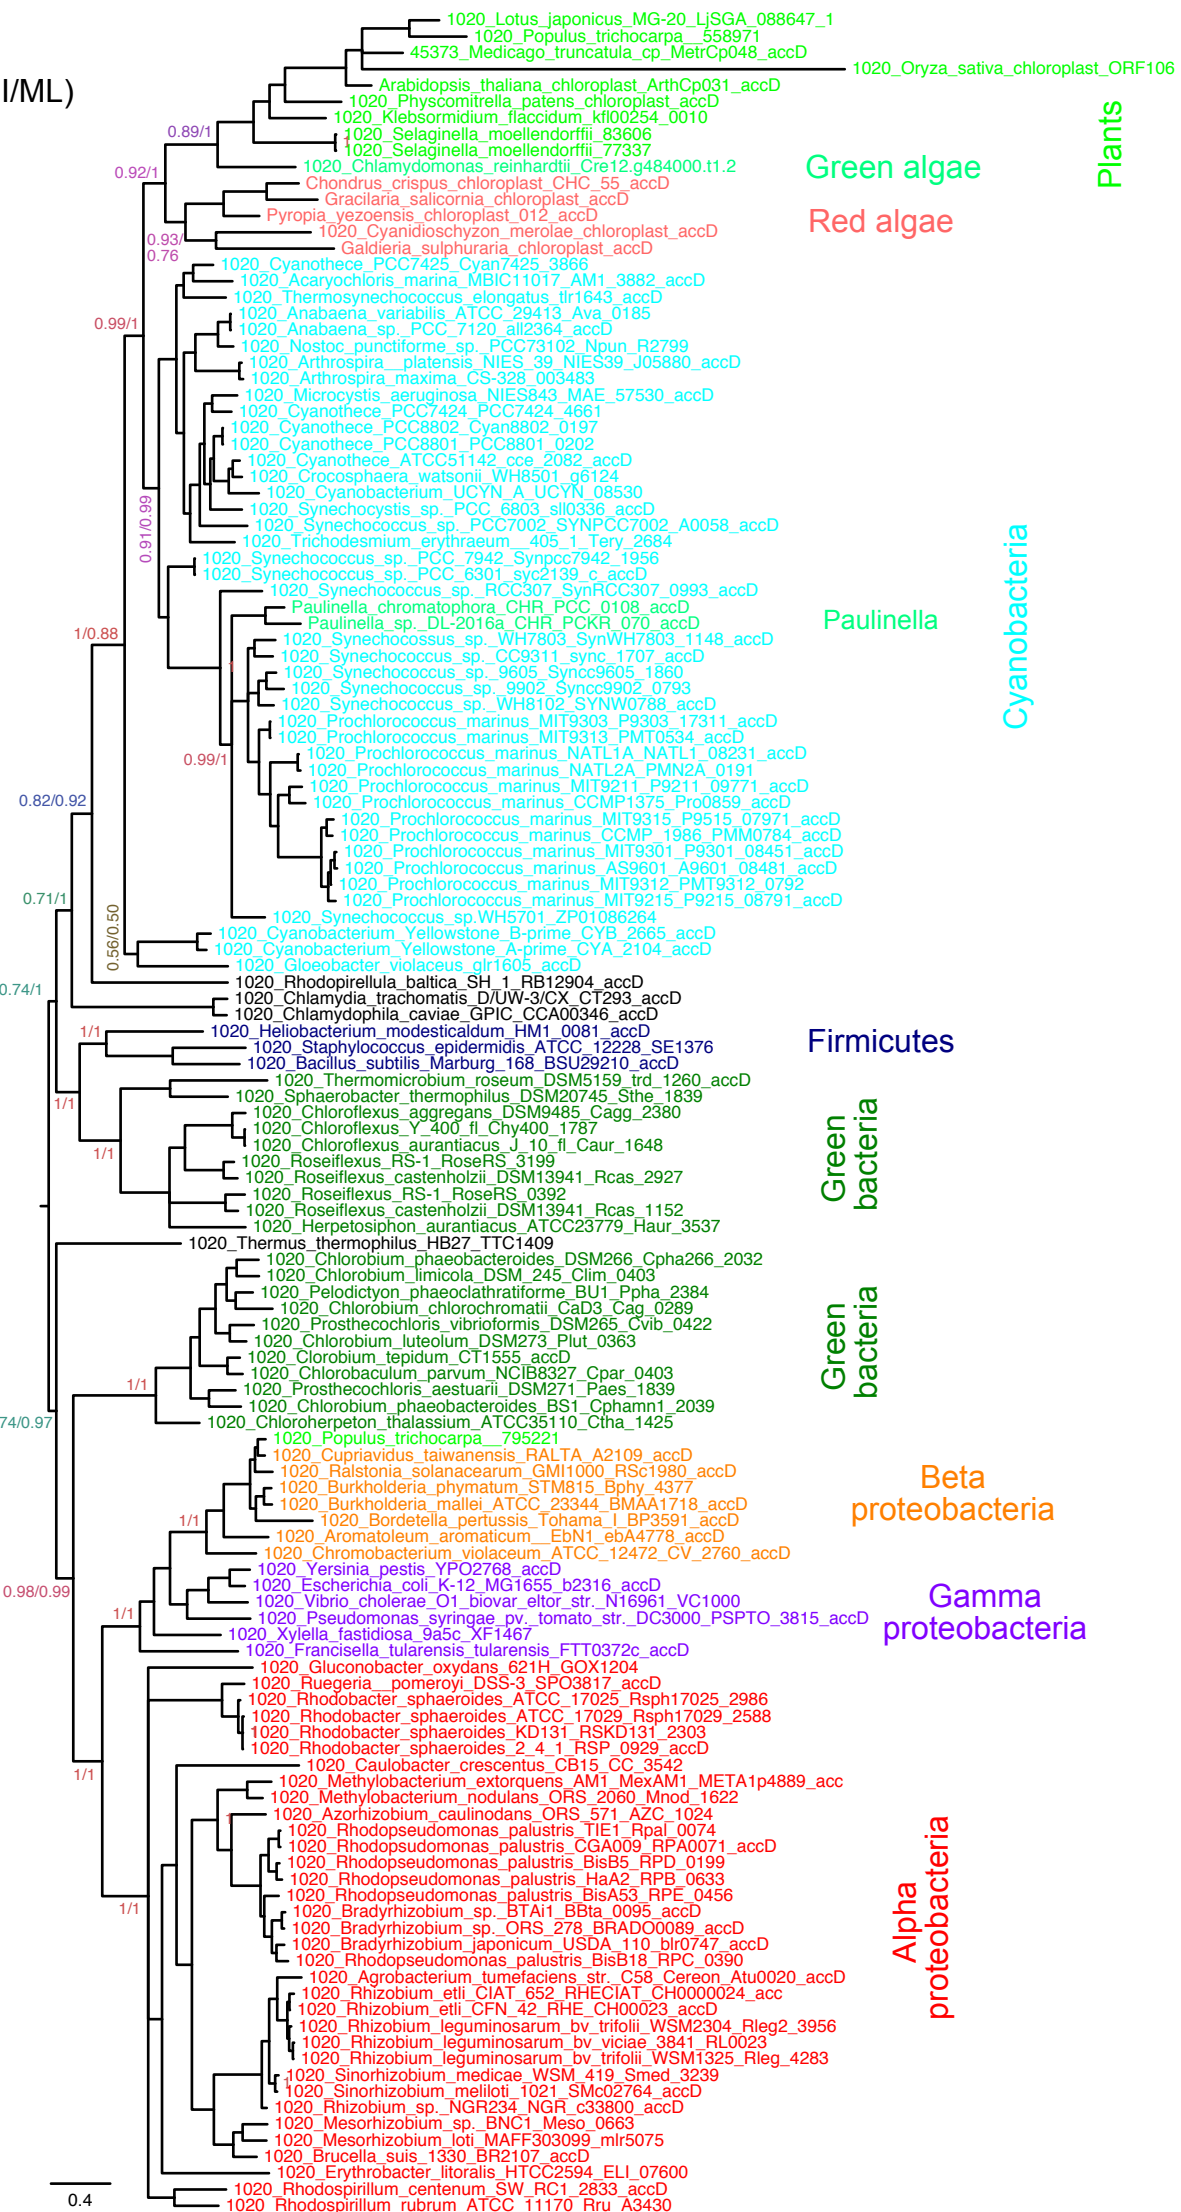

Plants

Green algae

Red algae

Cyanobacteria

Paulinella

Firmicutes

Green bacteria

Green bacteria

Beta proteobacteria

Gamma proteobacteria

Alpha proteobacteria

0.4

ACP (ML/BI)  
Selected taxa

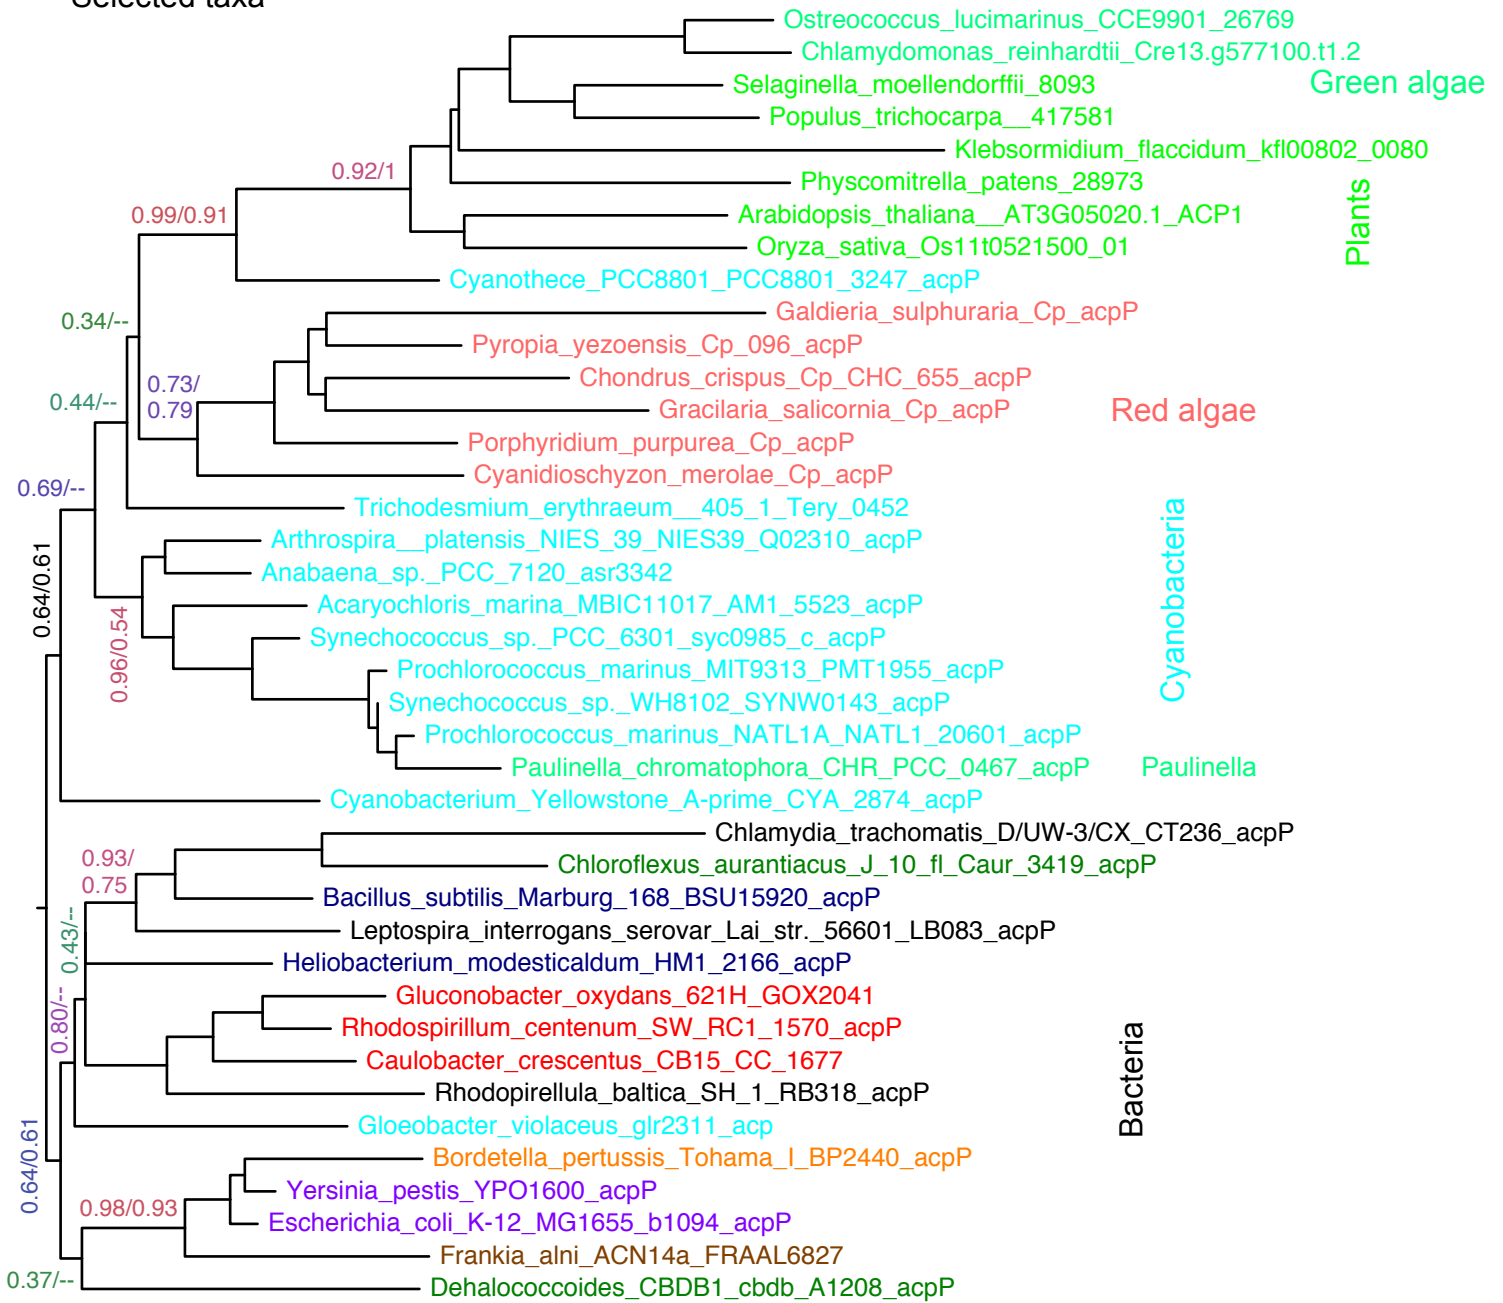

0.2

ACP (ML/BI)

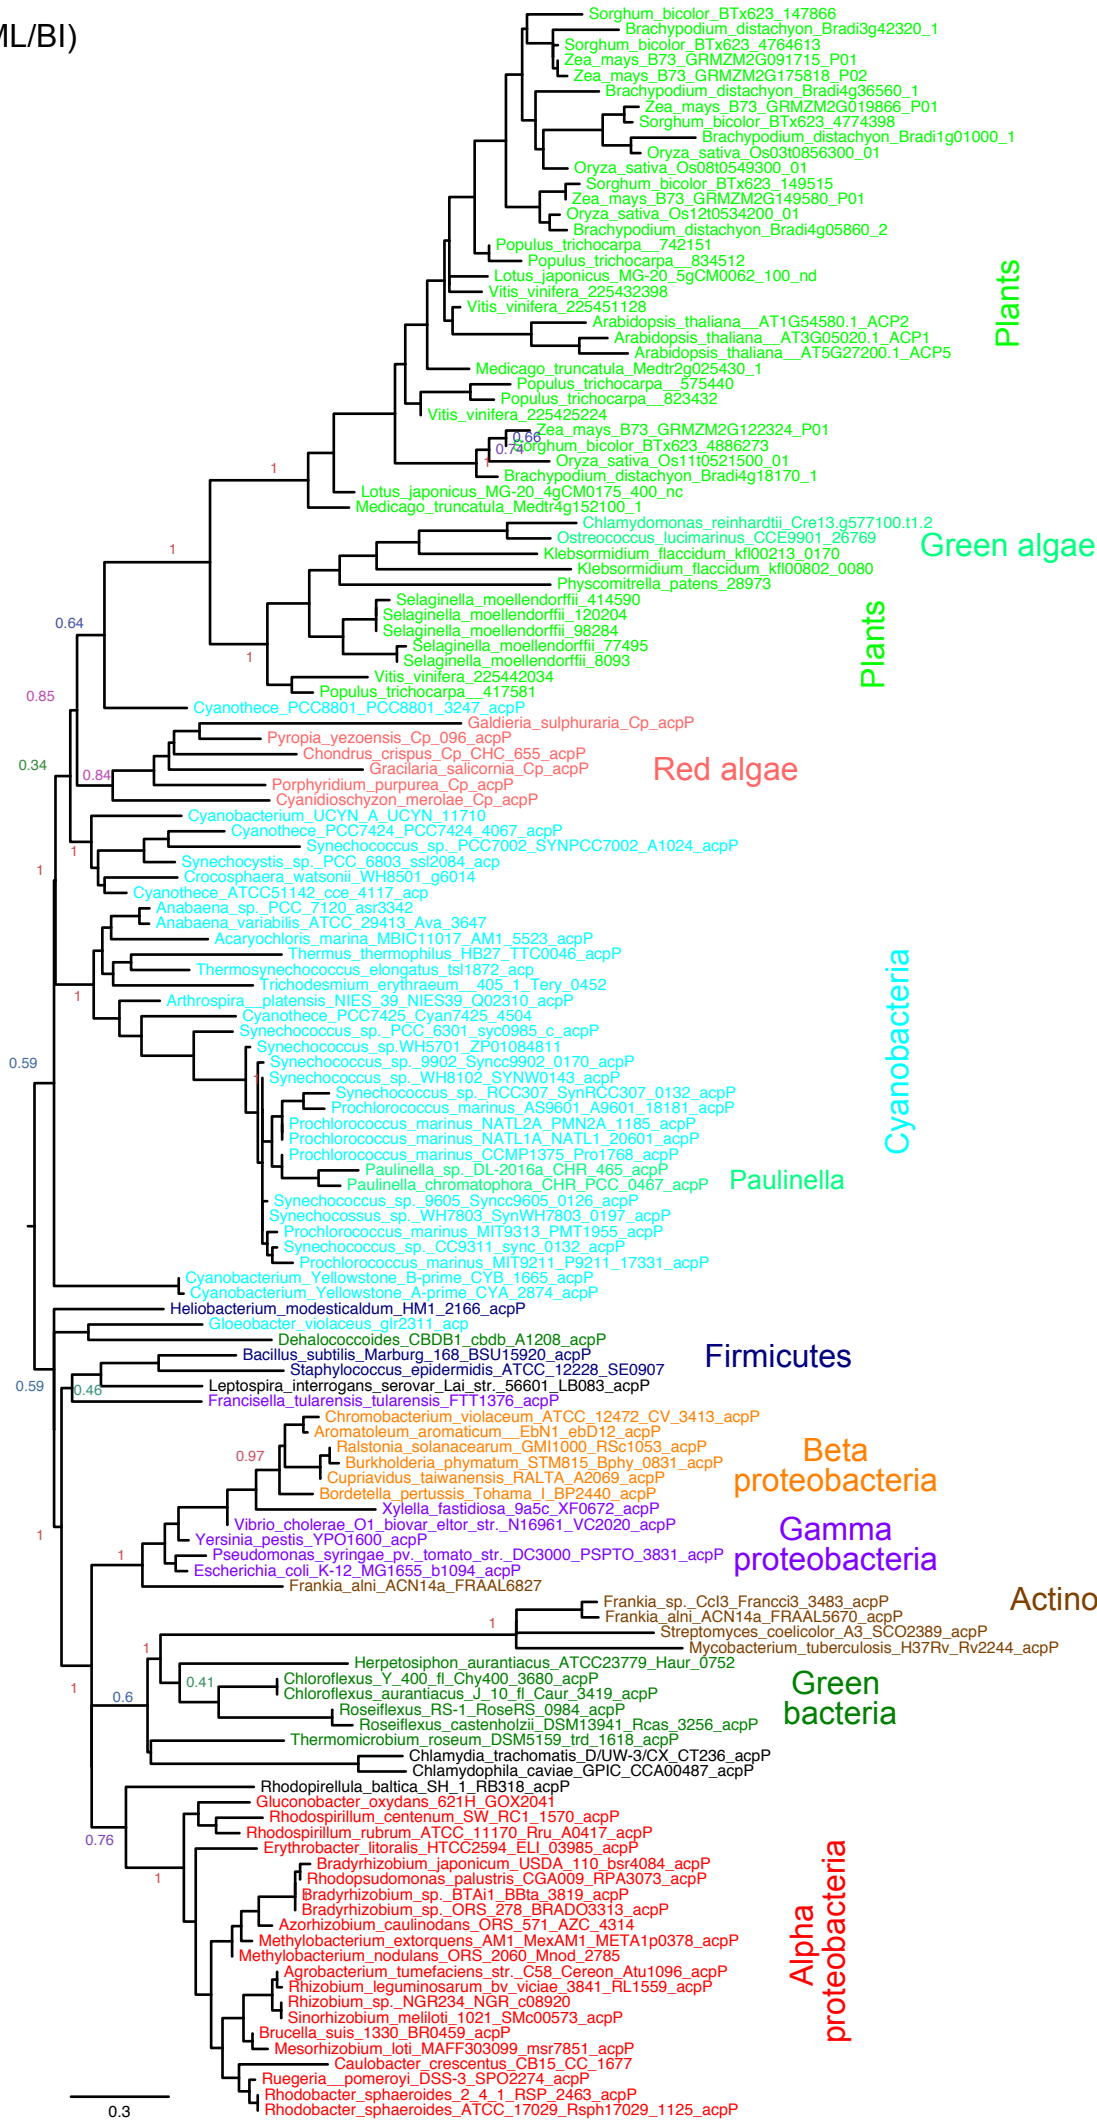

Plants

Green algae

Plants

Red algae

Cyanobacteria

Paulinella

Firmicutes

Beta proteobacteria

Gamma proteobacteria

Actinobacteria

Green bacteria

Alpha proteobacteria

0.3

ACP (ML)  
Large data

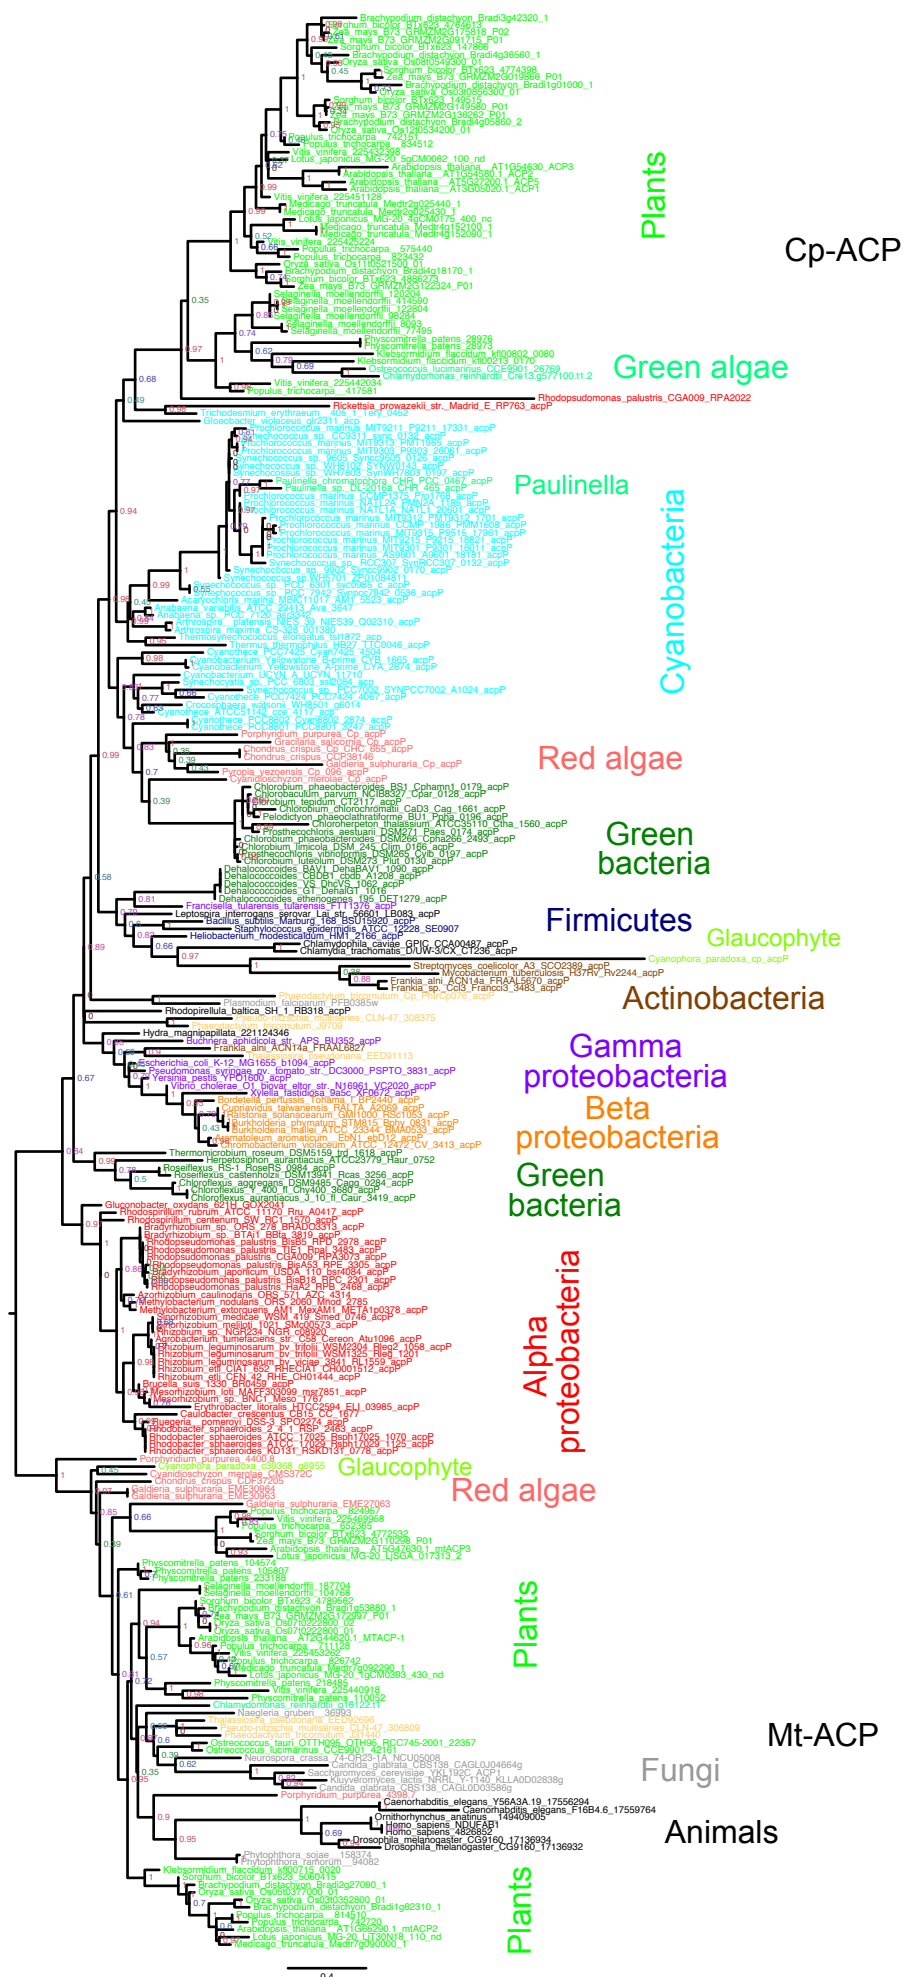



FabBF (BI/ML)  
[KAS I/II, mtKAS]

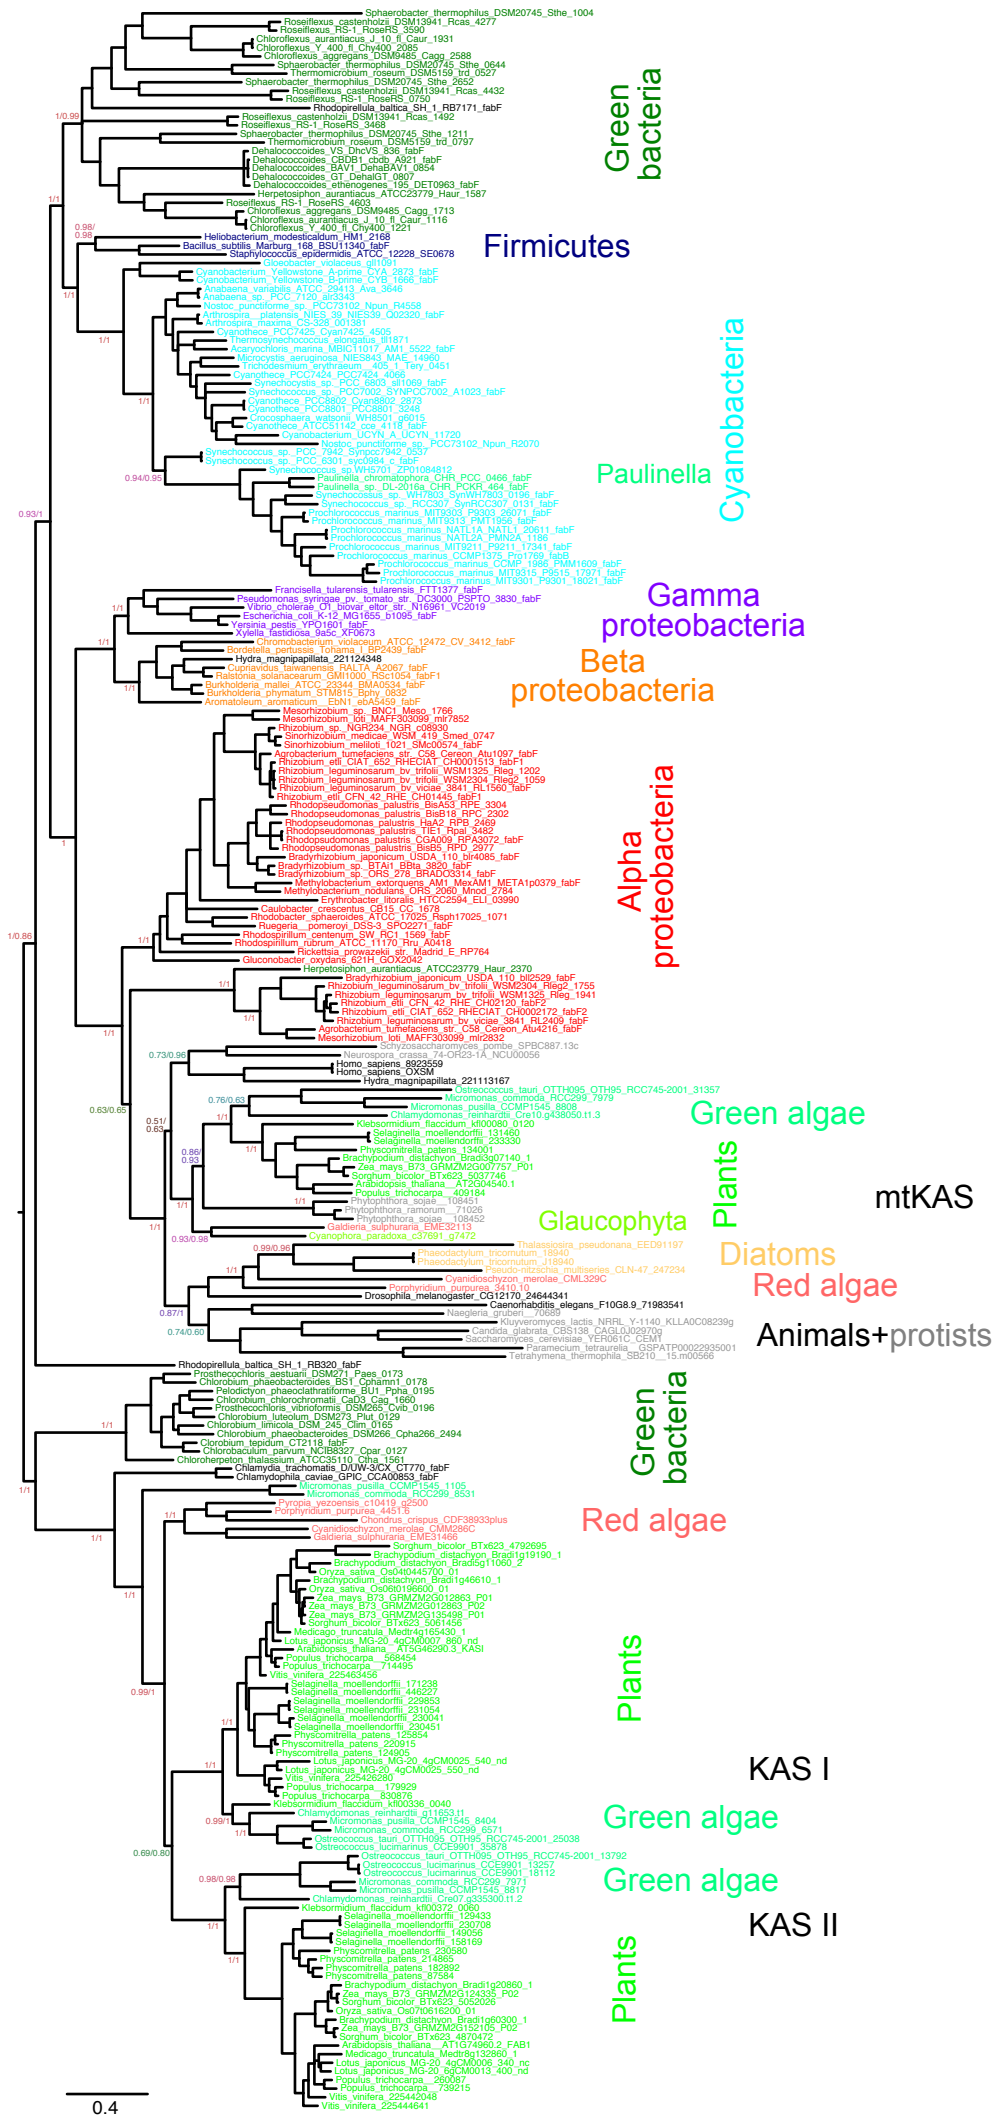

0.4

# FabD (BI/ML)

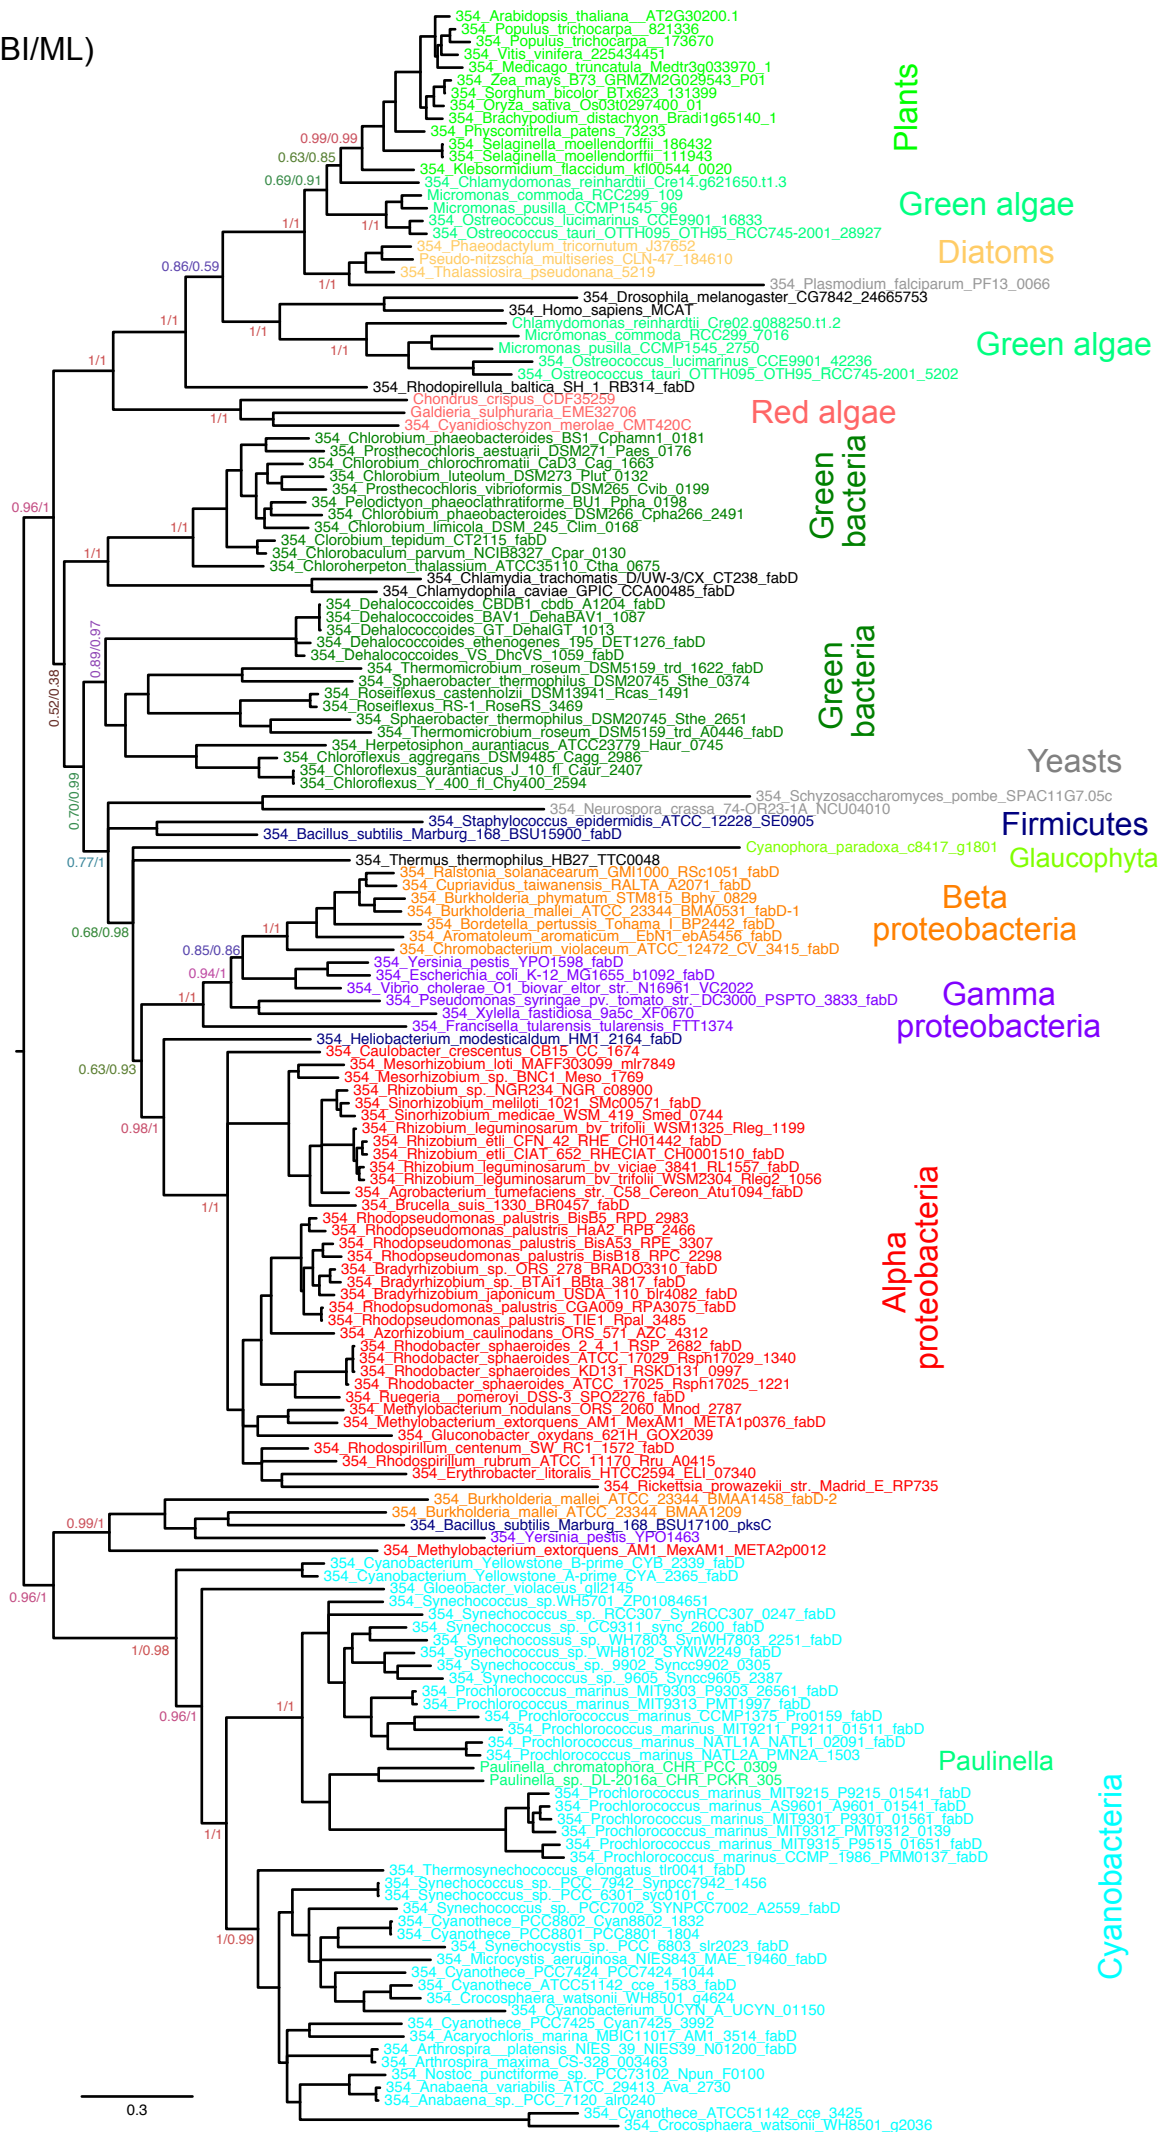

FabG (BI/ML)

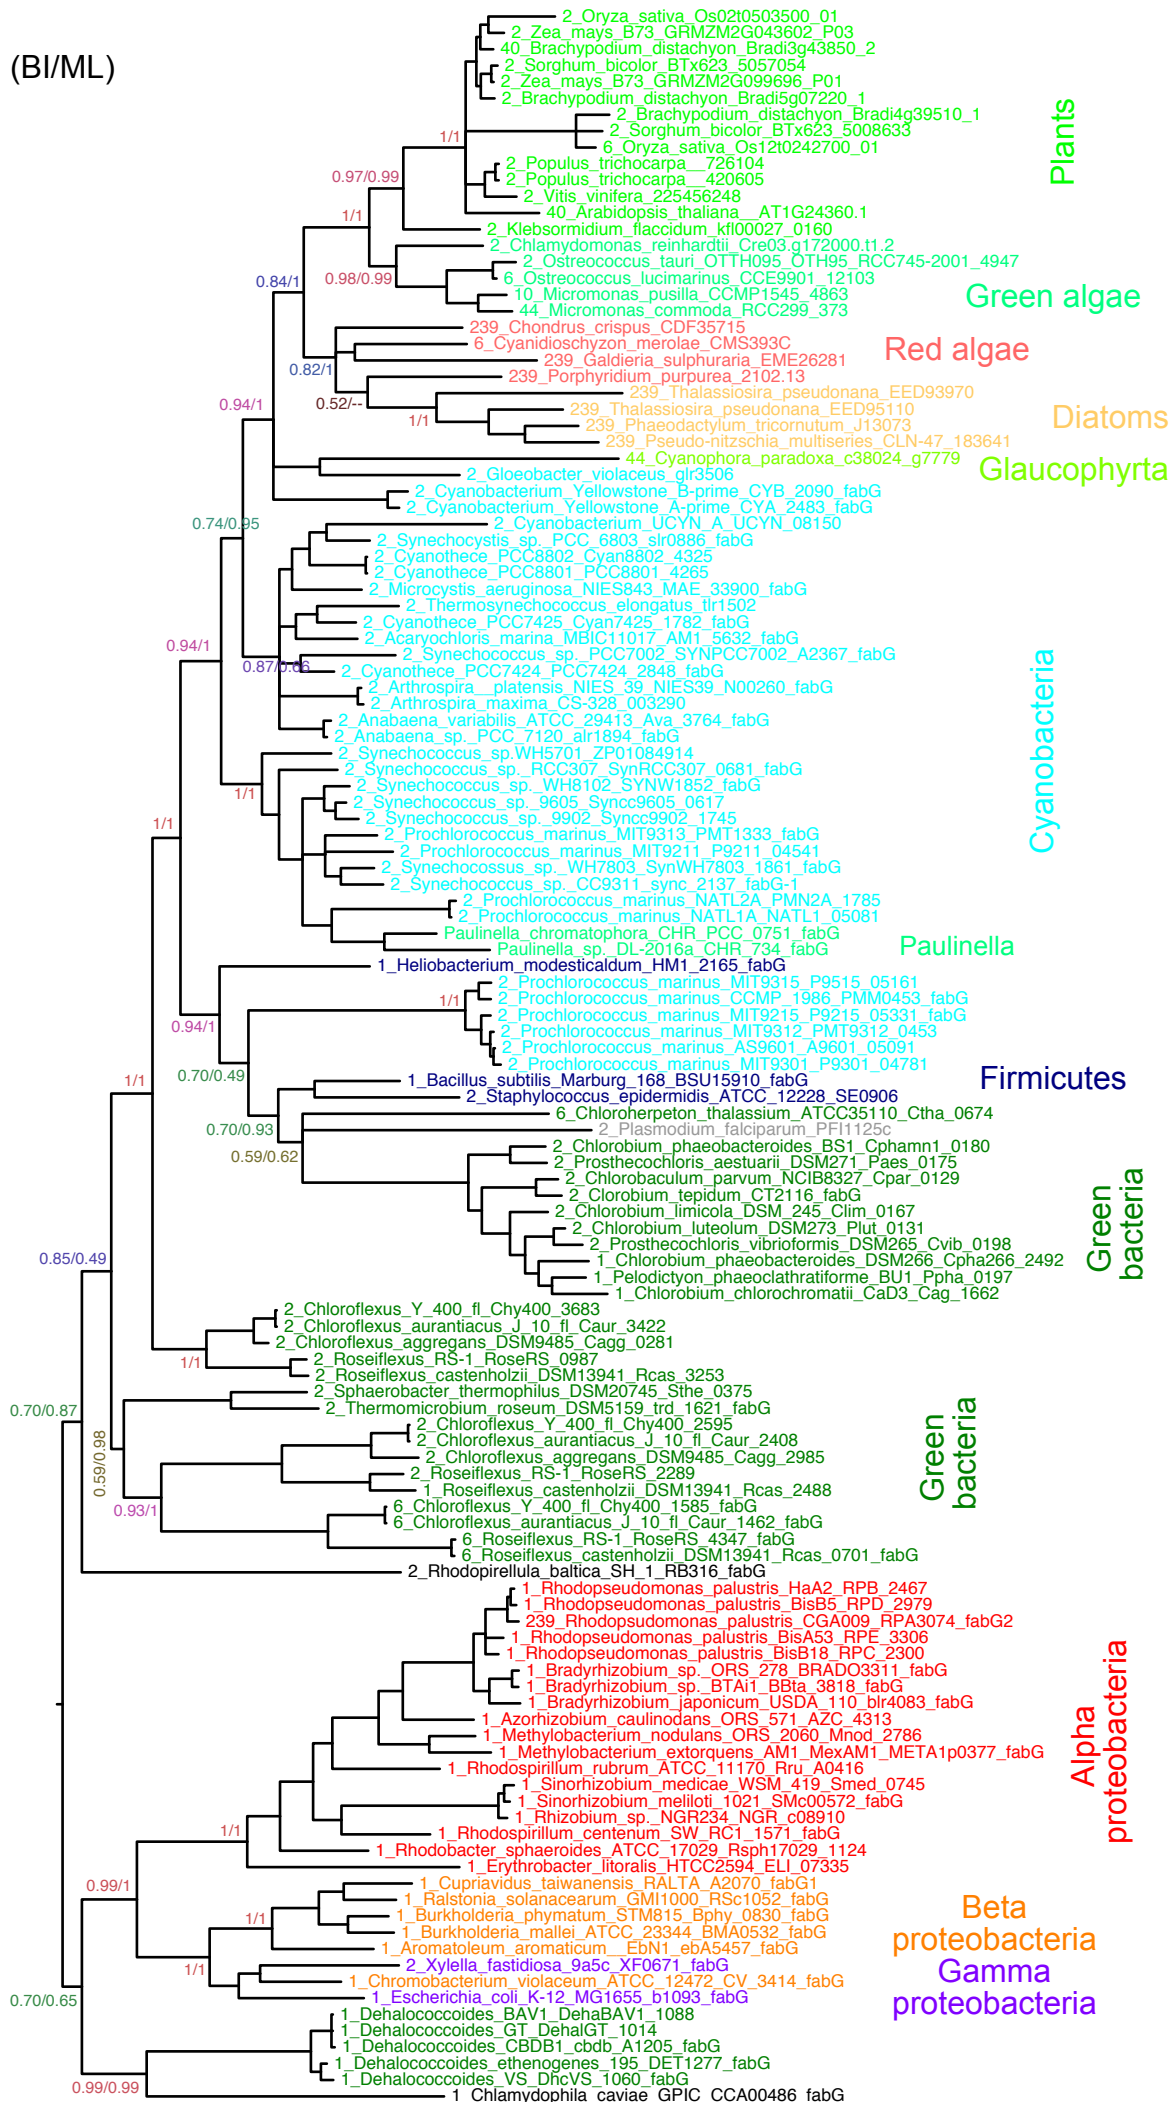

FabI (BI/ML)

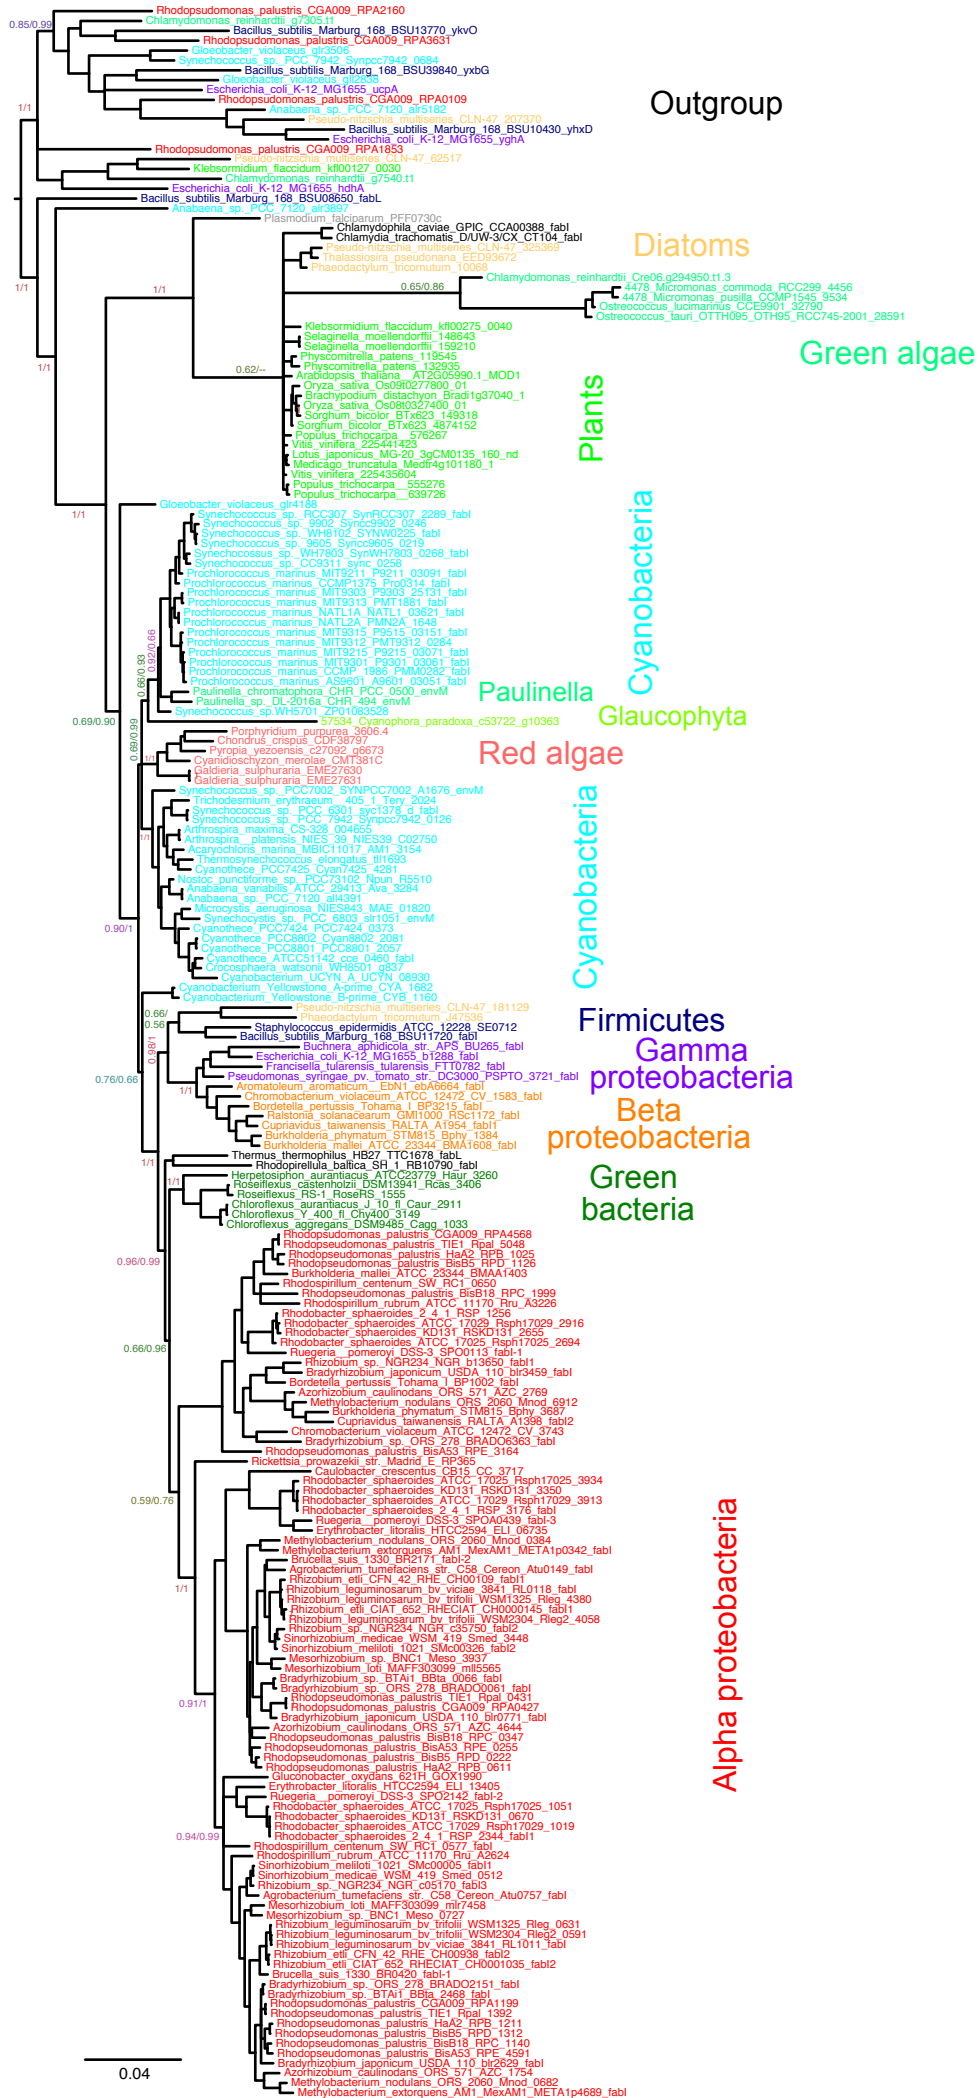

# FabZ (BI/ML)

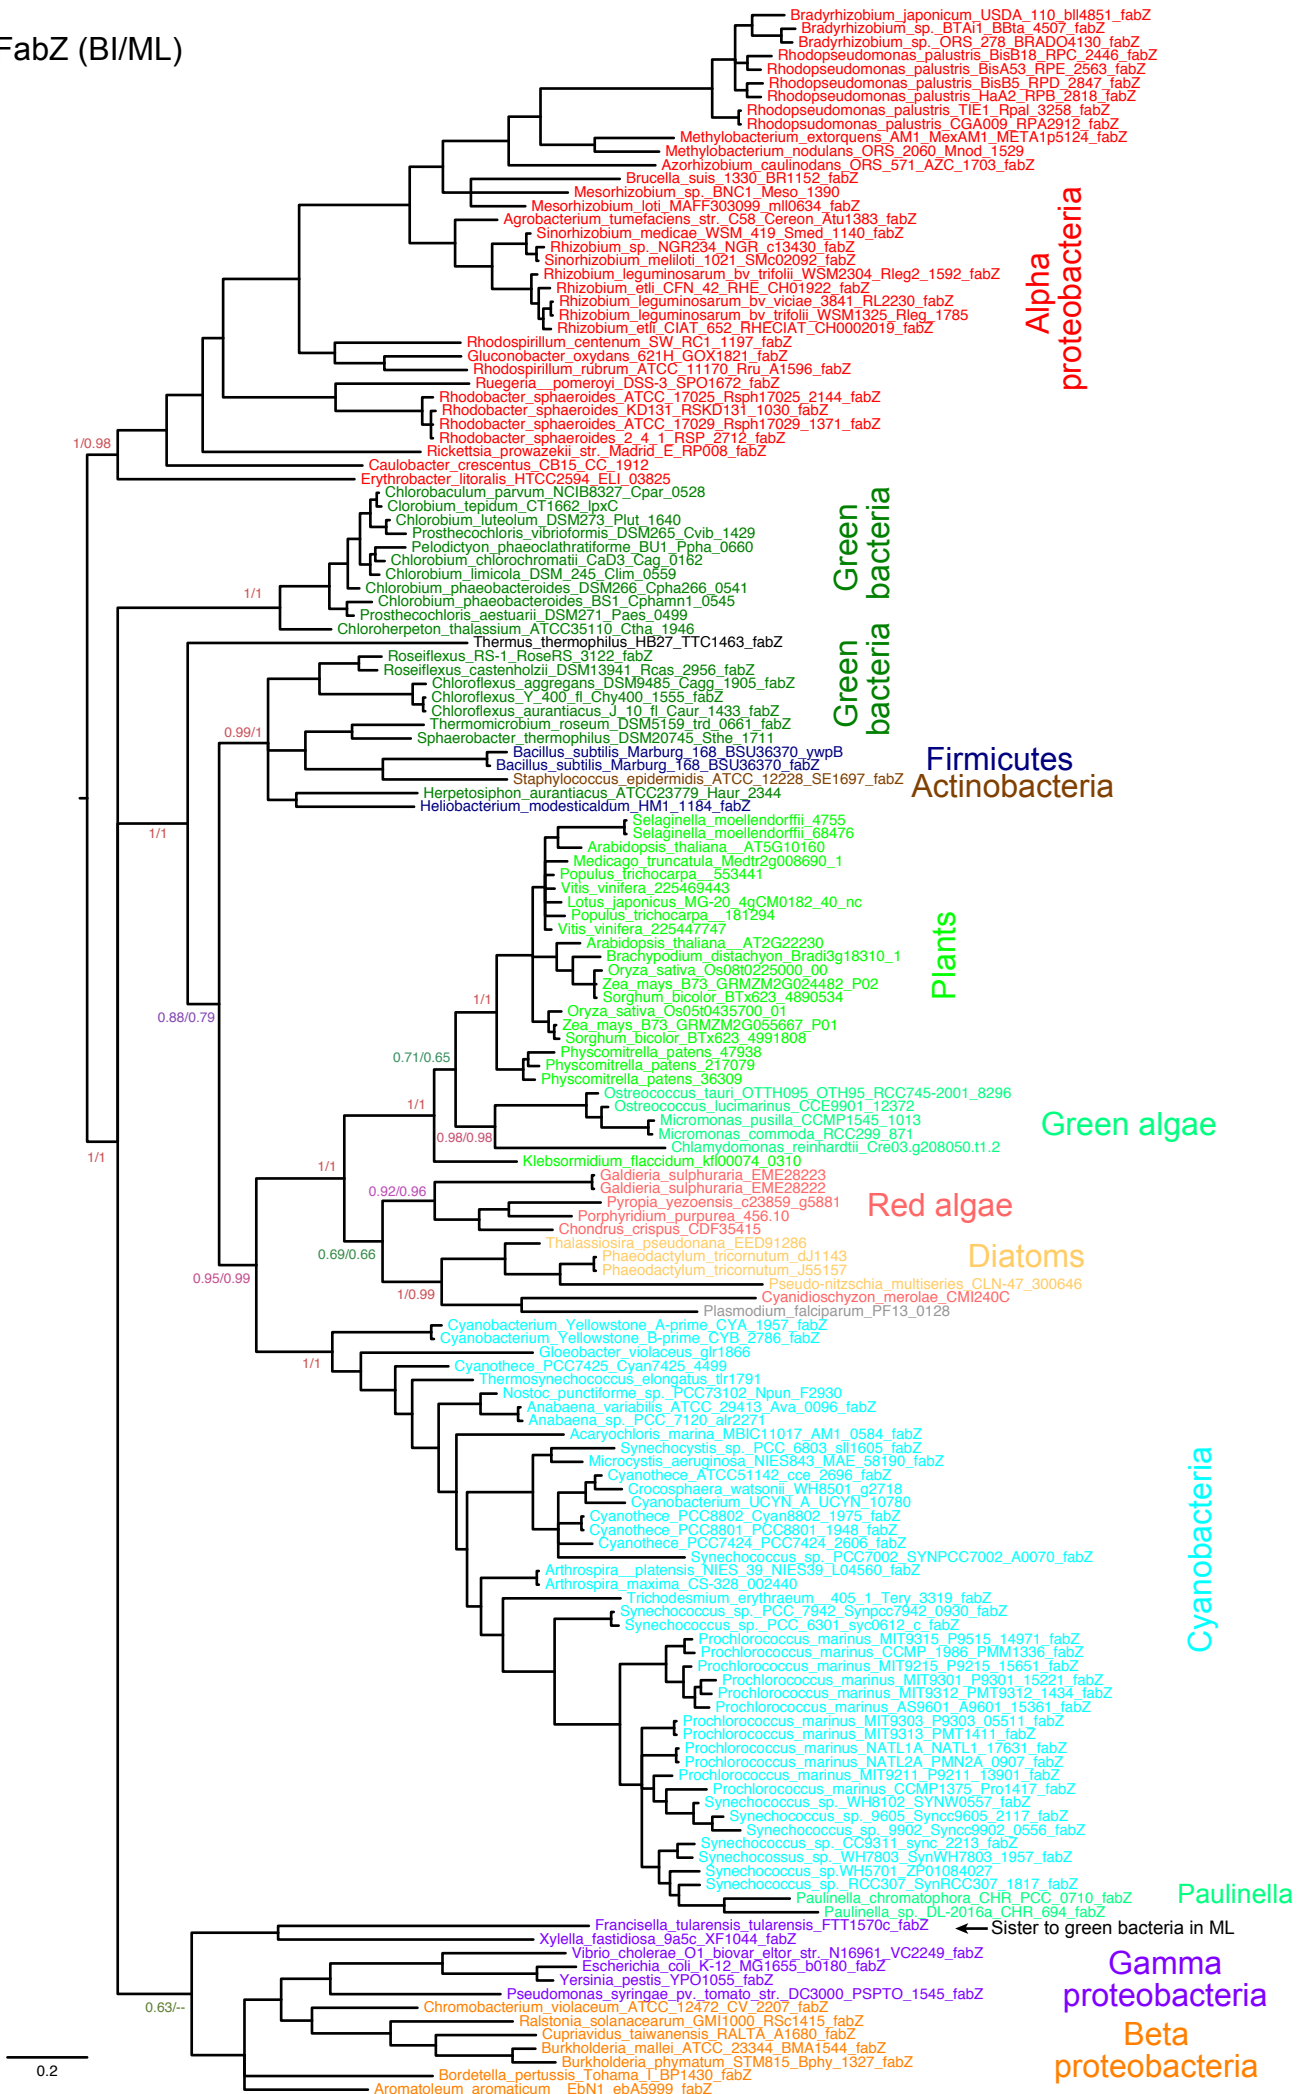

KAS III / FabH (B/I/ML)

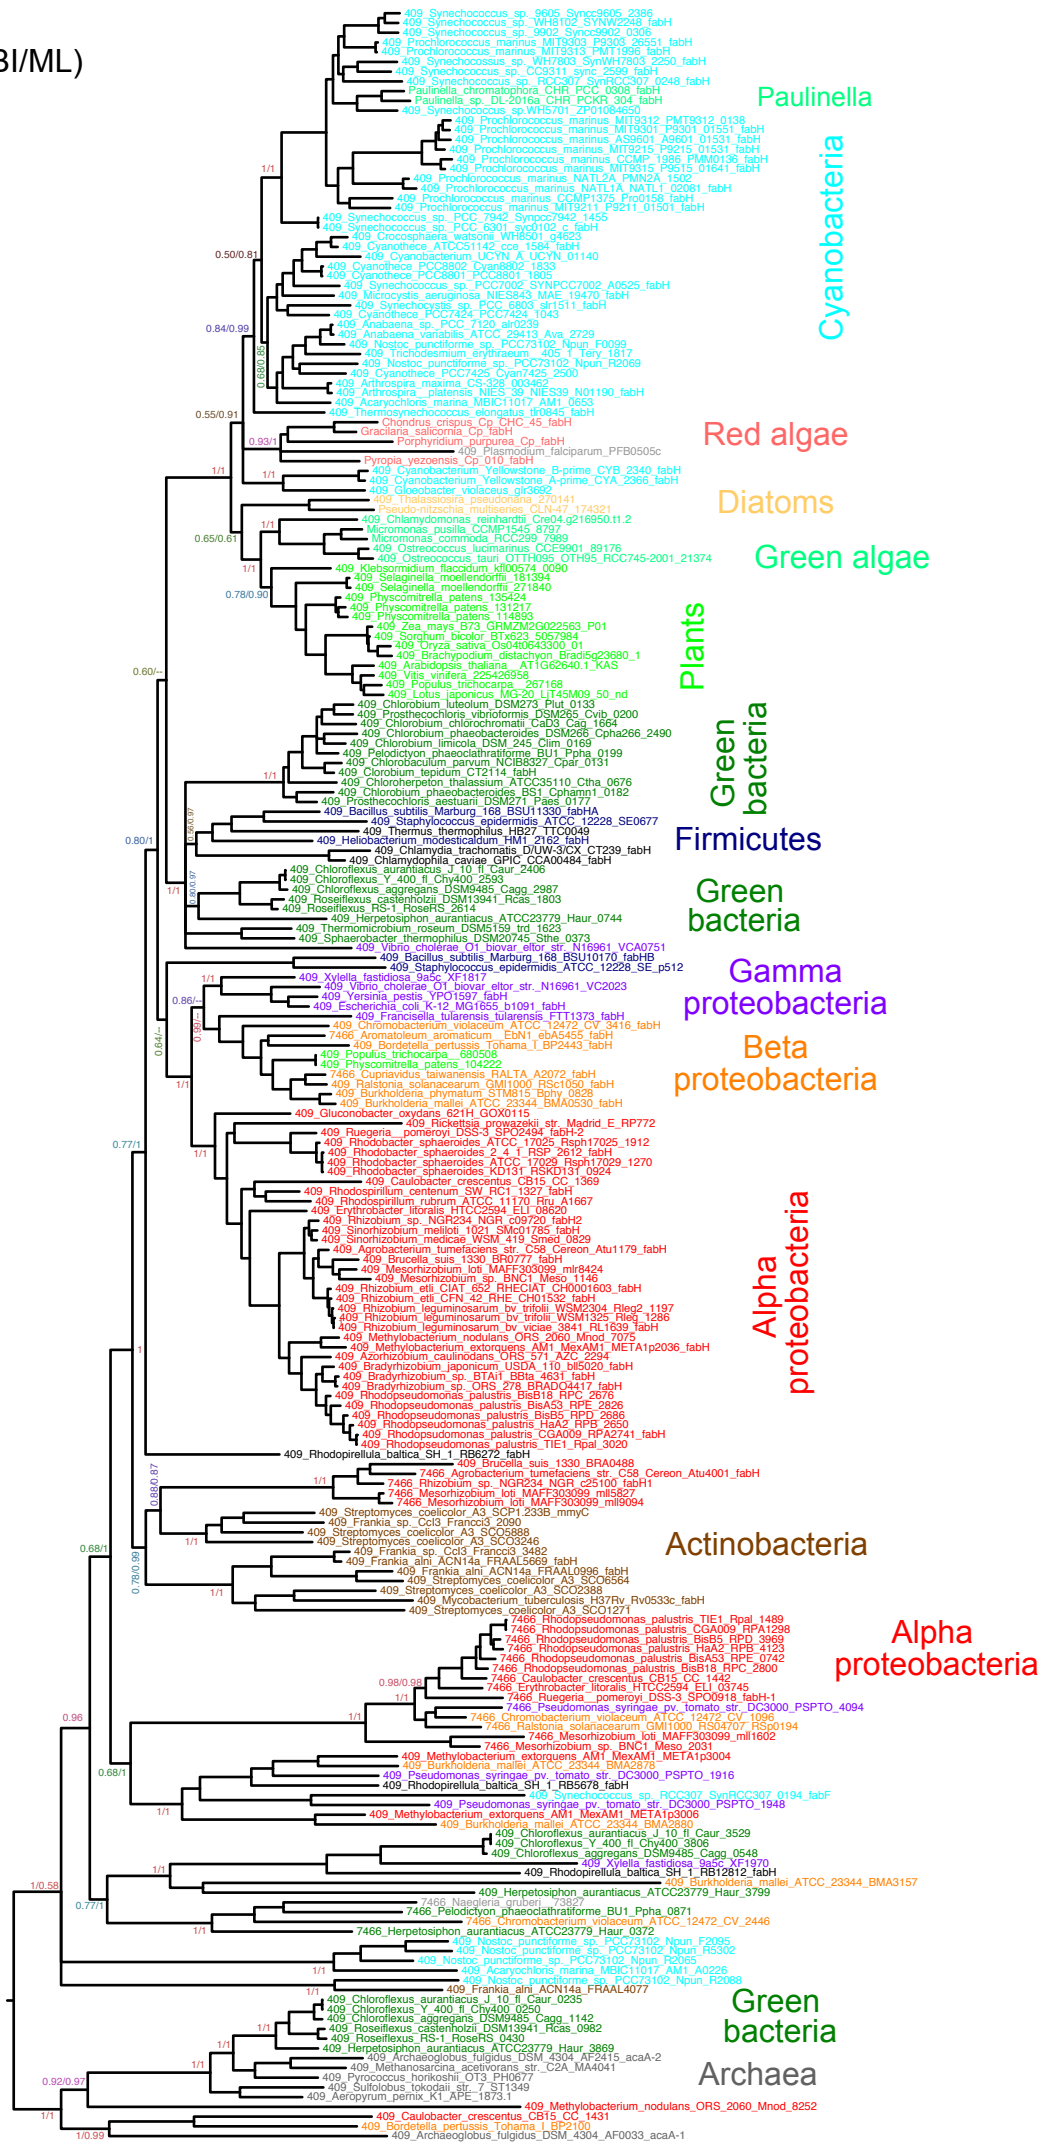

Paulinella

Cyanobacteria

Red algae

Diatoms

Green algae

Plants  
Green  
bacteria

Firmicutes

Green  
bacteria

Gamma  
proteobacteria

Beta  
proteobacteria

Alpha  
proteobacteria

Actinobacteria

Alpha  
proteobacteria

Green  
bacteria

Archaea

FadA (Fad4)  
(BI/ML)

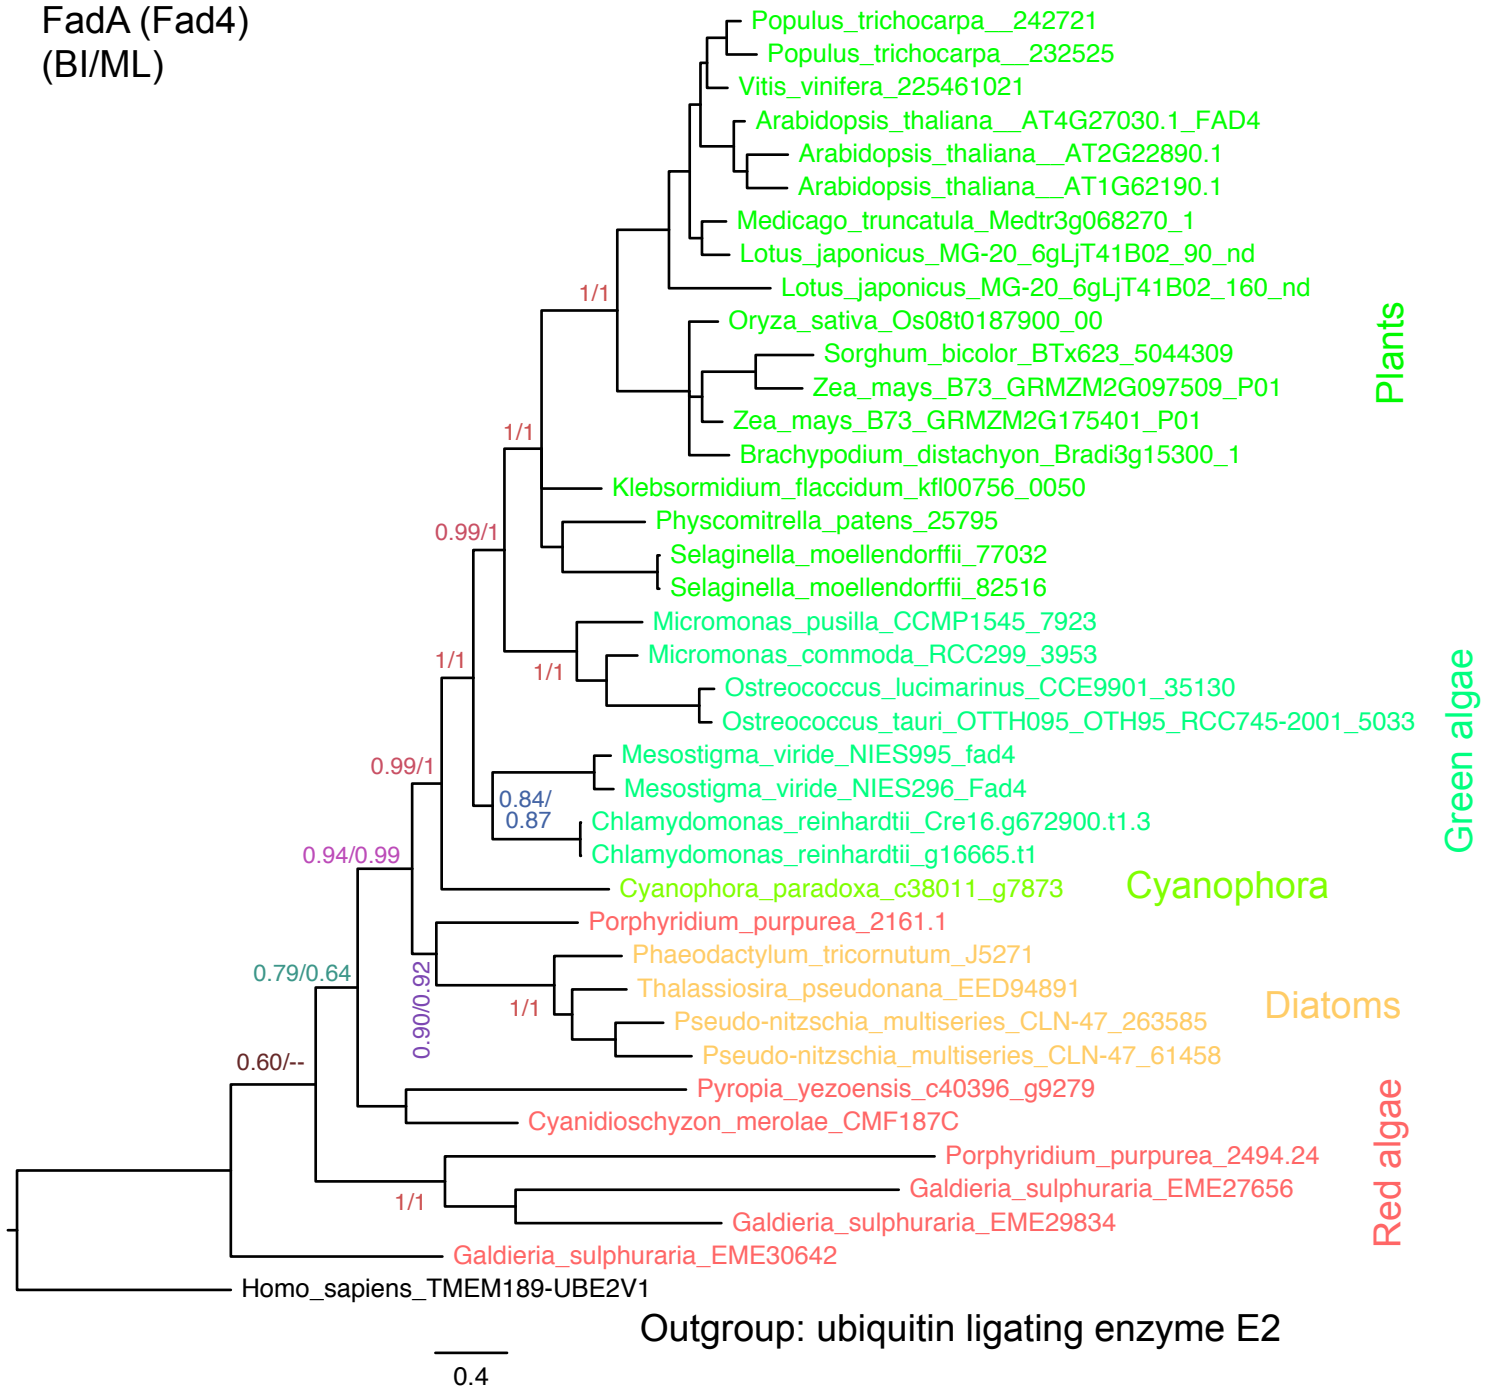

SAD (BI/ML)

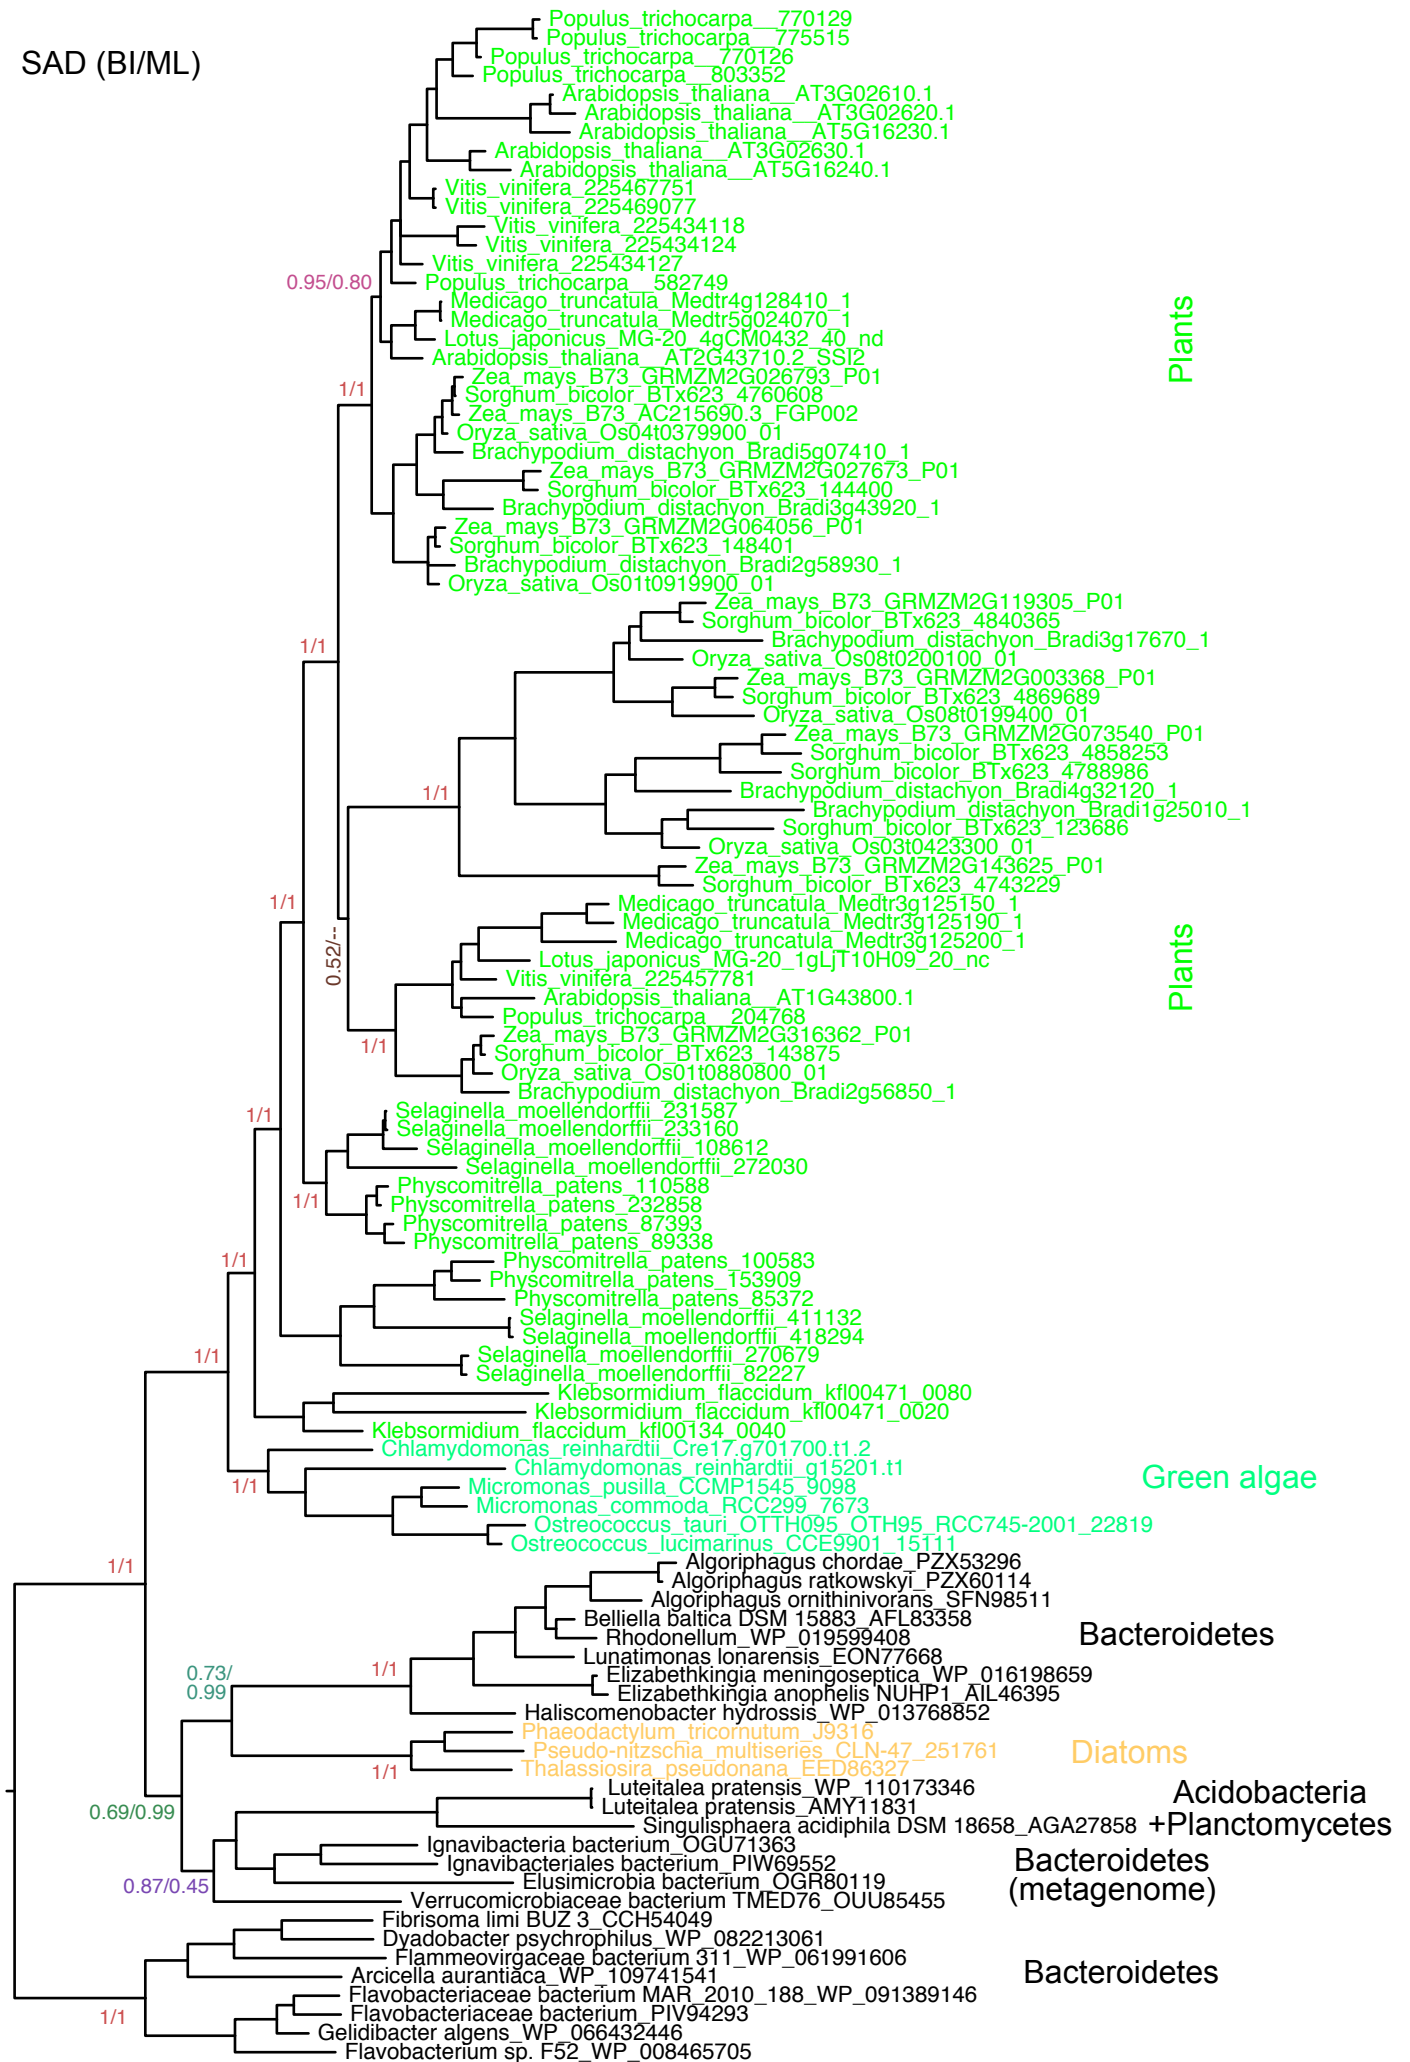

Plants

Plants

Green algae

Bacteroidetes

Diatoms

Acidobacteria

+Planctomycetes

Bacteroidetes (metagenome)

Bacteroidetes

0.3



# Desaturases (BI/ML)

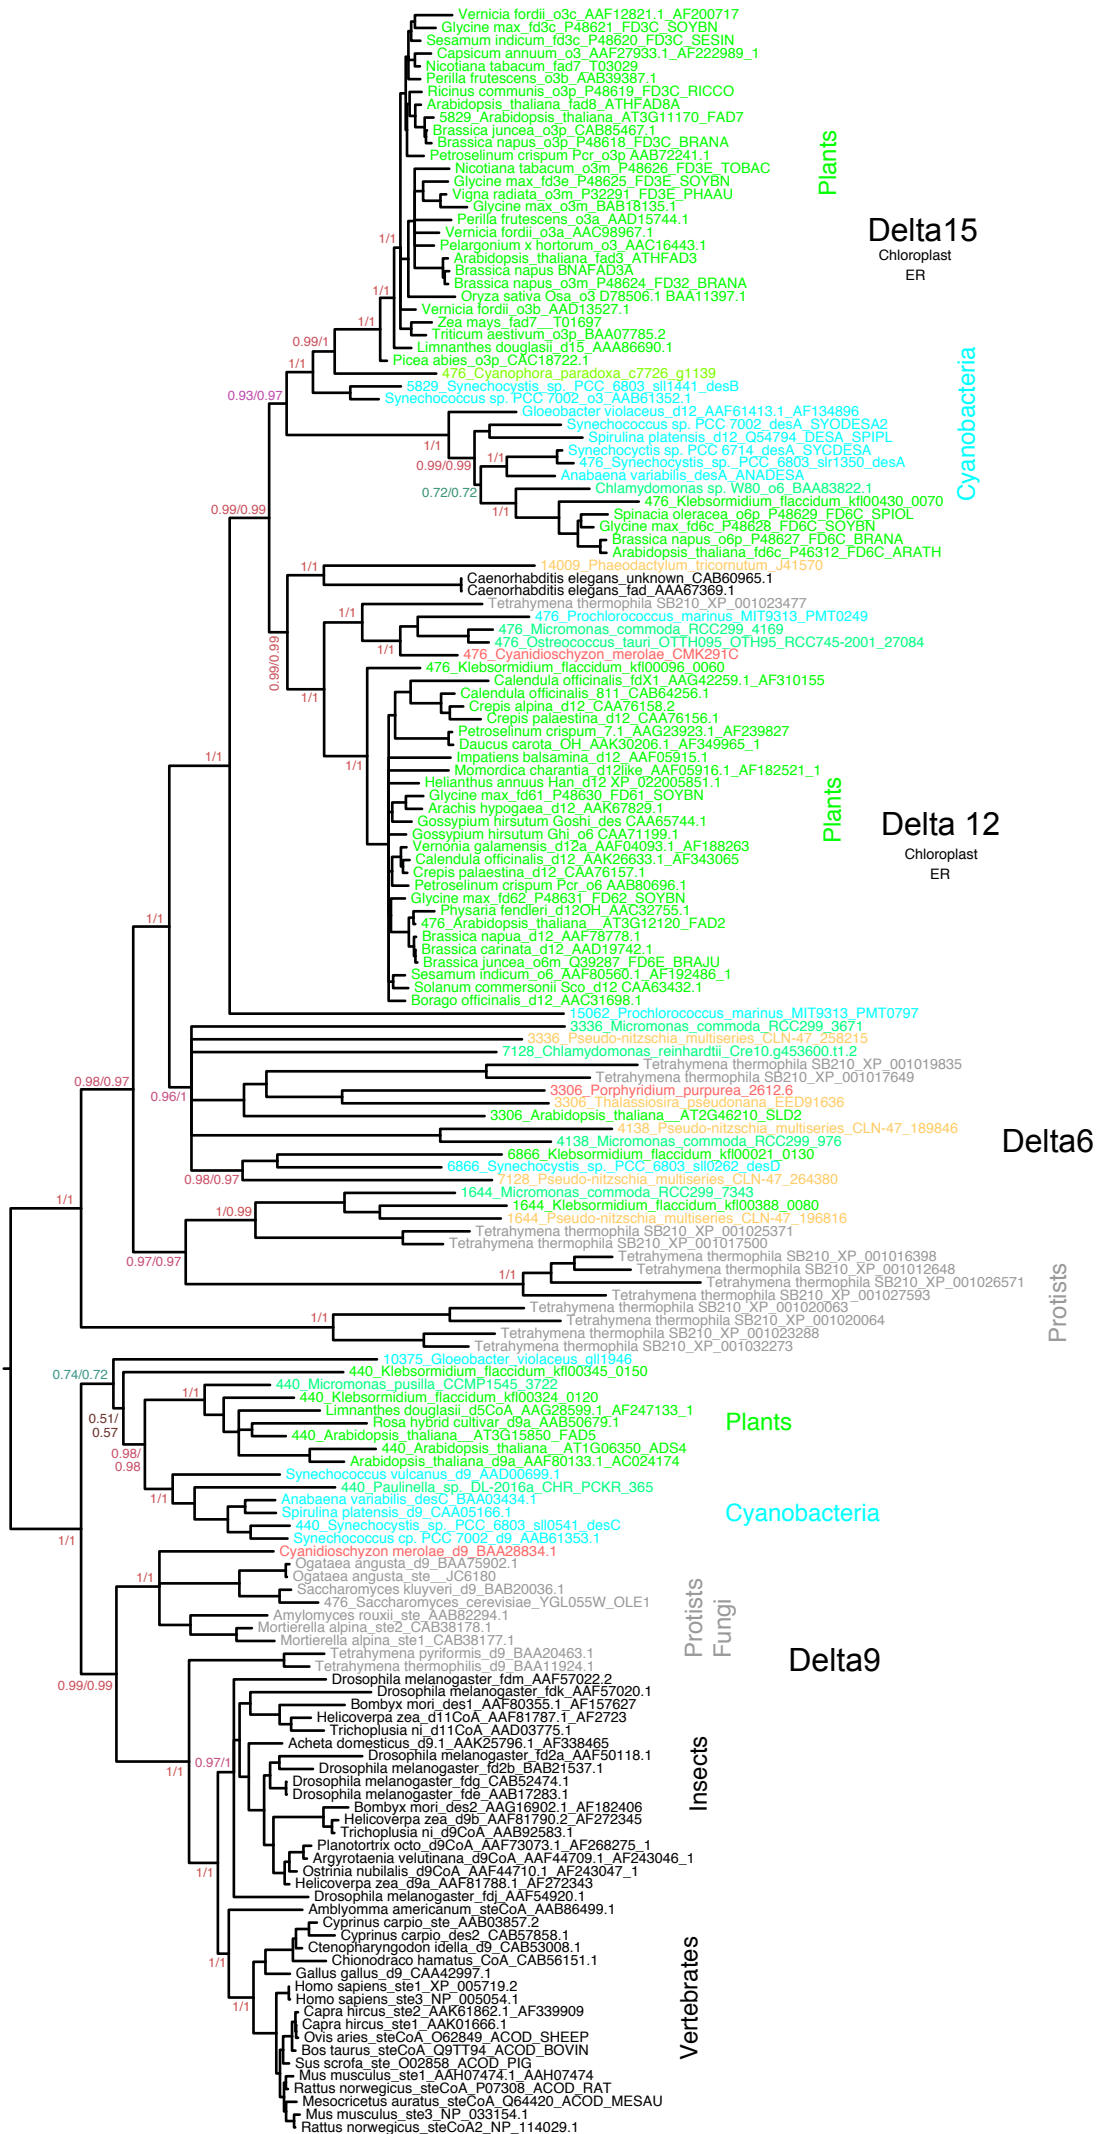

Supplement: 10265_2019_1157_MOESM3_ESM.pdf [file 10265_2019_1157_MOESM3_ESM.pdf]
