# Supplementary material for: Complex origins of chloroplast membranes with photosynthetic machineries: multiple transfers of genes from divergent organisms at different times or a single endosymbiotic event?
Source: PubMed Central journal article supplement (PMC6946739; doi:10.1007/s10265-019-01157-z), 2019-12-06

## **Journal of Plant Research**

### **Online Resources**

Complex origins of chloroplast membranes with photosynthetic machineries: Multiple transfers of genes from divergent organisms at different times or a single endosymbiotic event?

Naoki Sato

University of Tokyo

naokisat@bio.c.u-tokyo.ac.jp

### **Online Resource 5. Phylogenetic trees of Ndh proteins.**

Nine components of the chloroplast Ndh complex, A, B, C, E, F, G, H, I, and K are analyzed, either individually or as a catenated sequences. The sequences were retrieved from Gclust dataset CPBACT10. Phylogeny of NdhD was complicated because of many paralogs, whereas NdhJ was not present in *Nephroselmis*. These two subunits were not analyzed with other subunits, but individual trees were constructed based on Gclust dataset CyanoClust 4.

## NdhA (BI/ML)

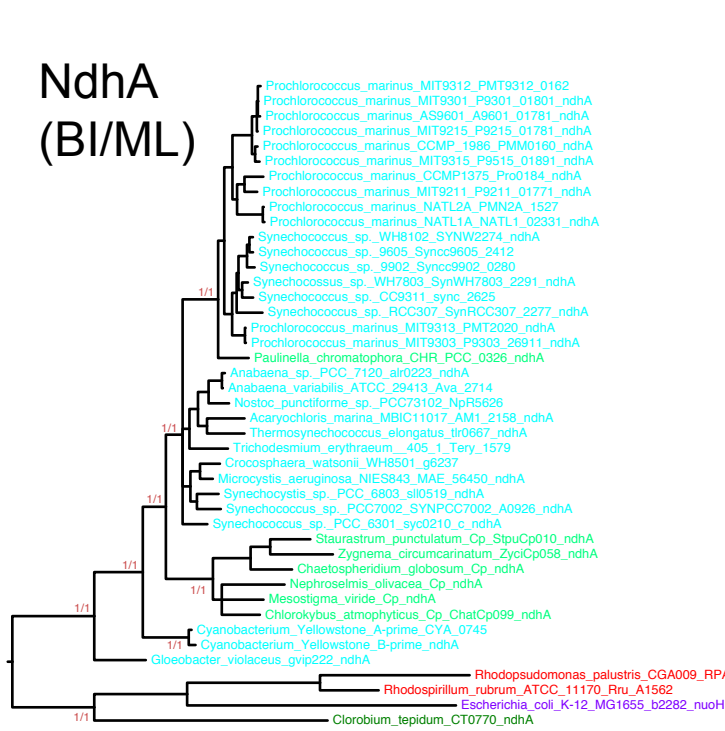

## NdhB (BI/ML)

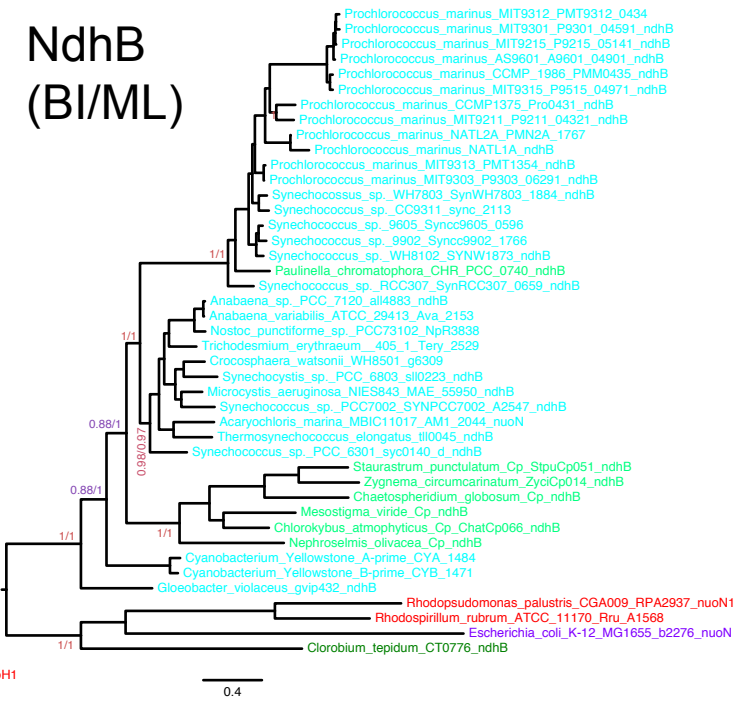

## NdhC (BI/ML)

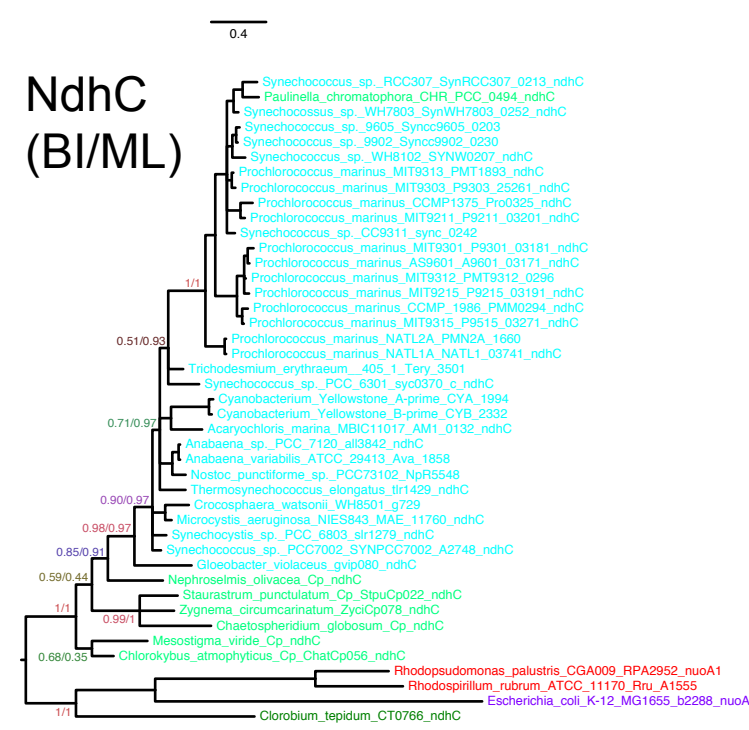

## NdhE (BI/ML)

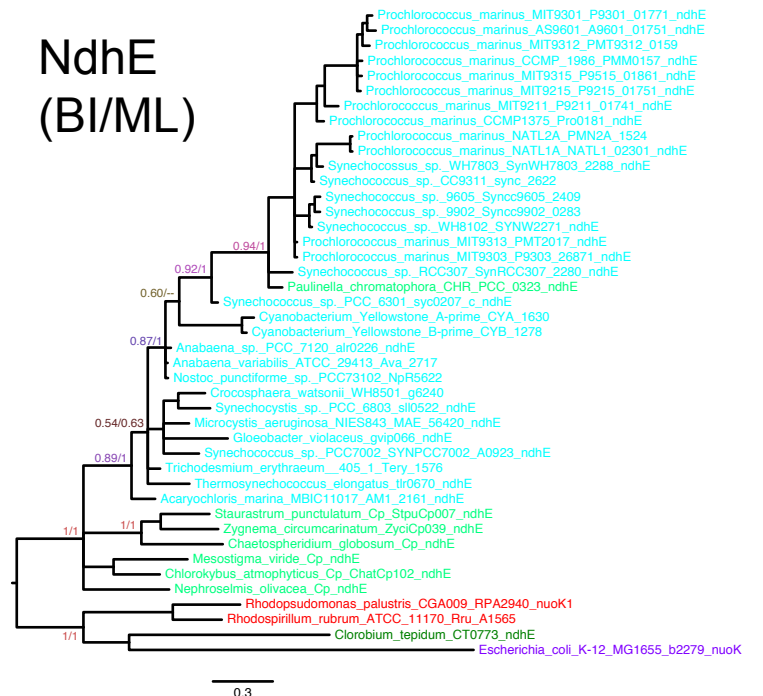

## NdhF (BI/ML)

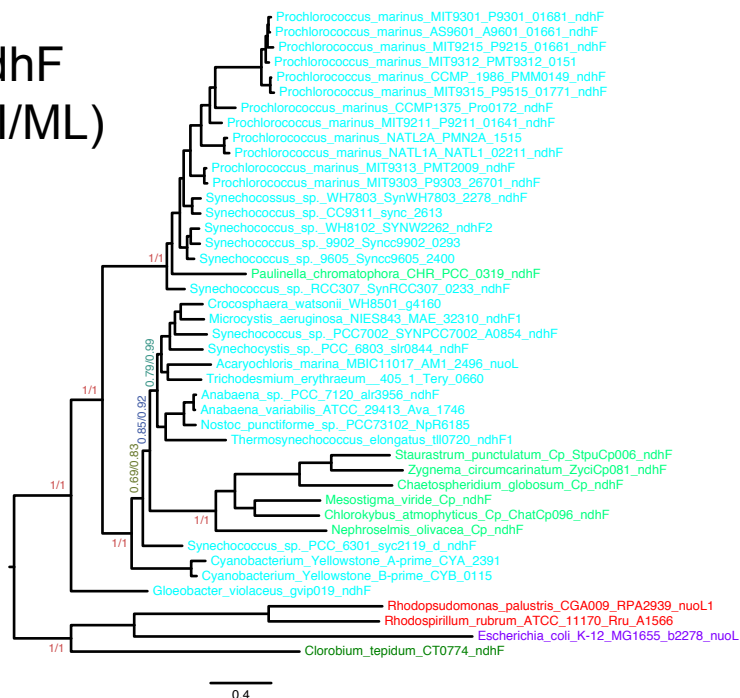

## NdhG (BI/ML)

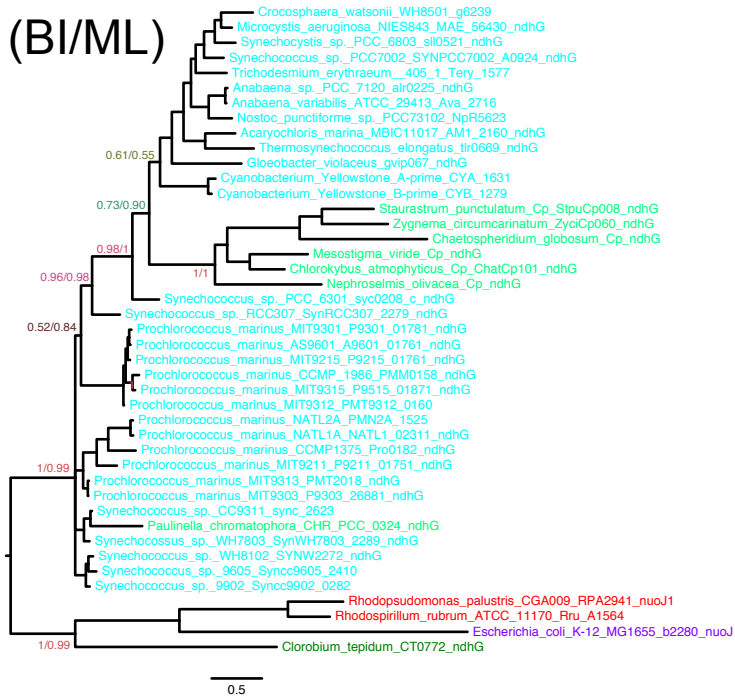

## NdhH (BI/ML)

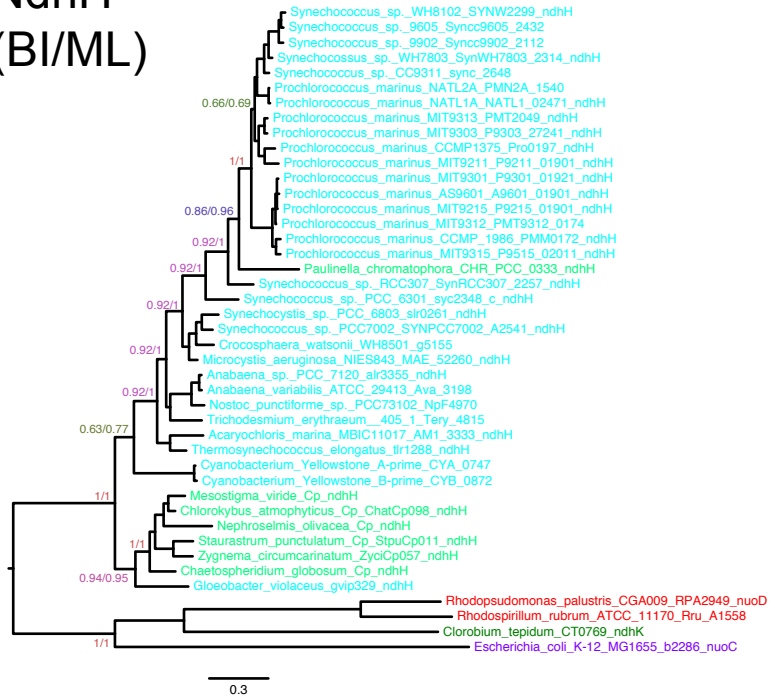

## NdhI (BI/ML)

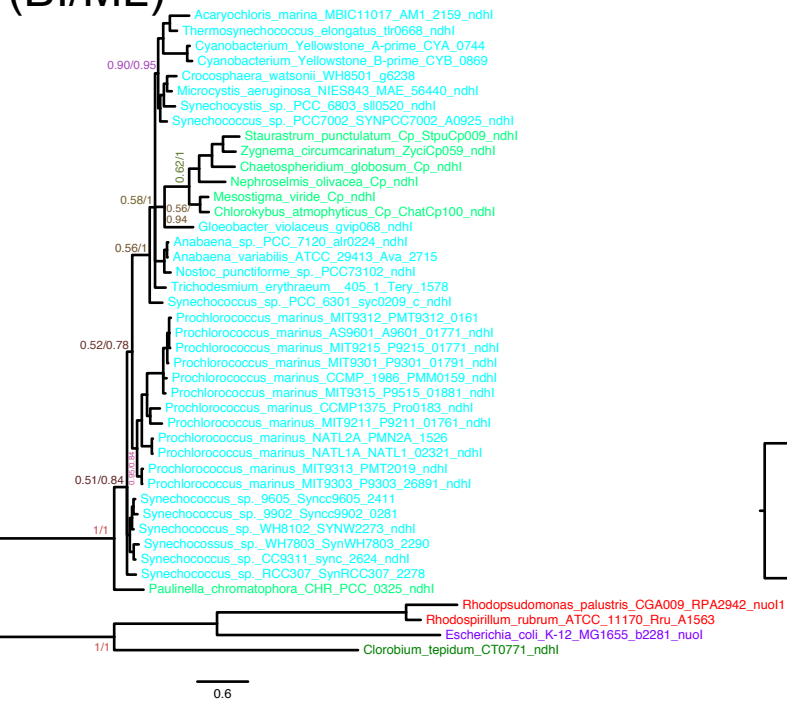

## NdhK (BI/ML)

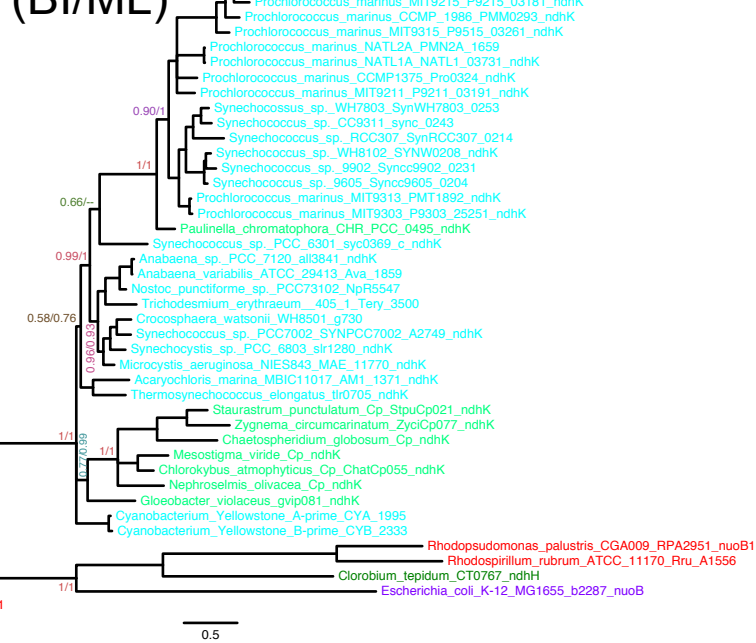

NDH all subunits  
(BI/ML)

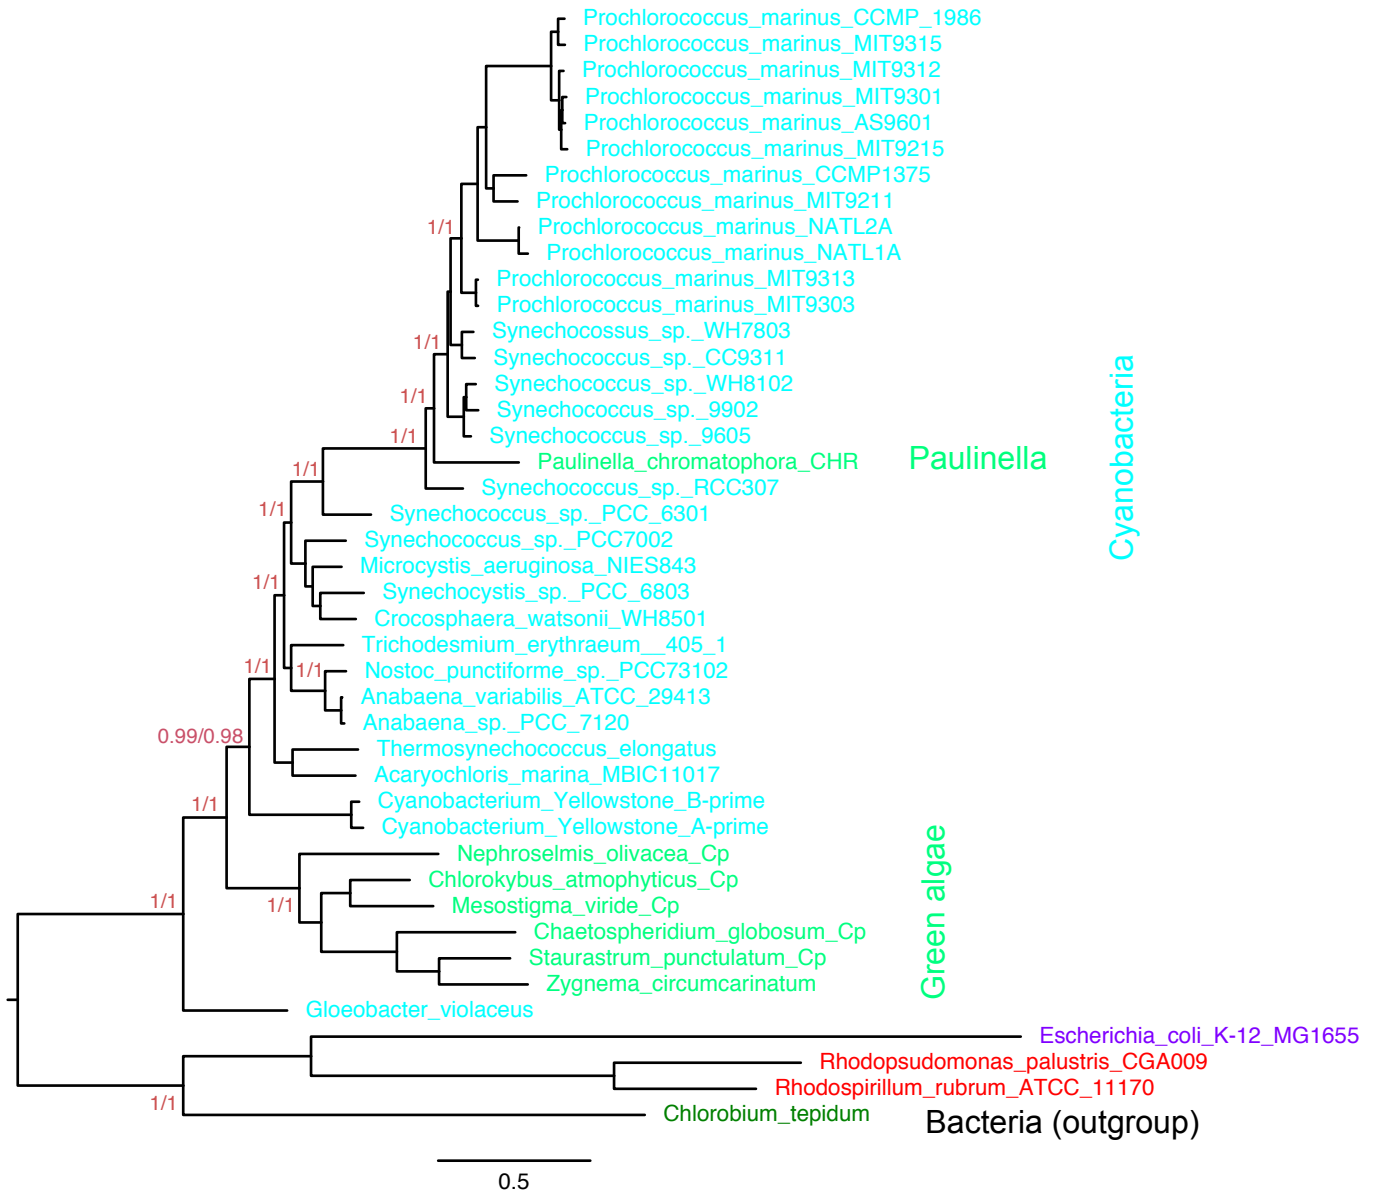

NdhD  
(BI/ML)

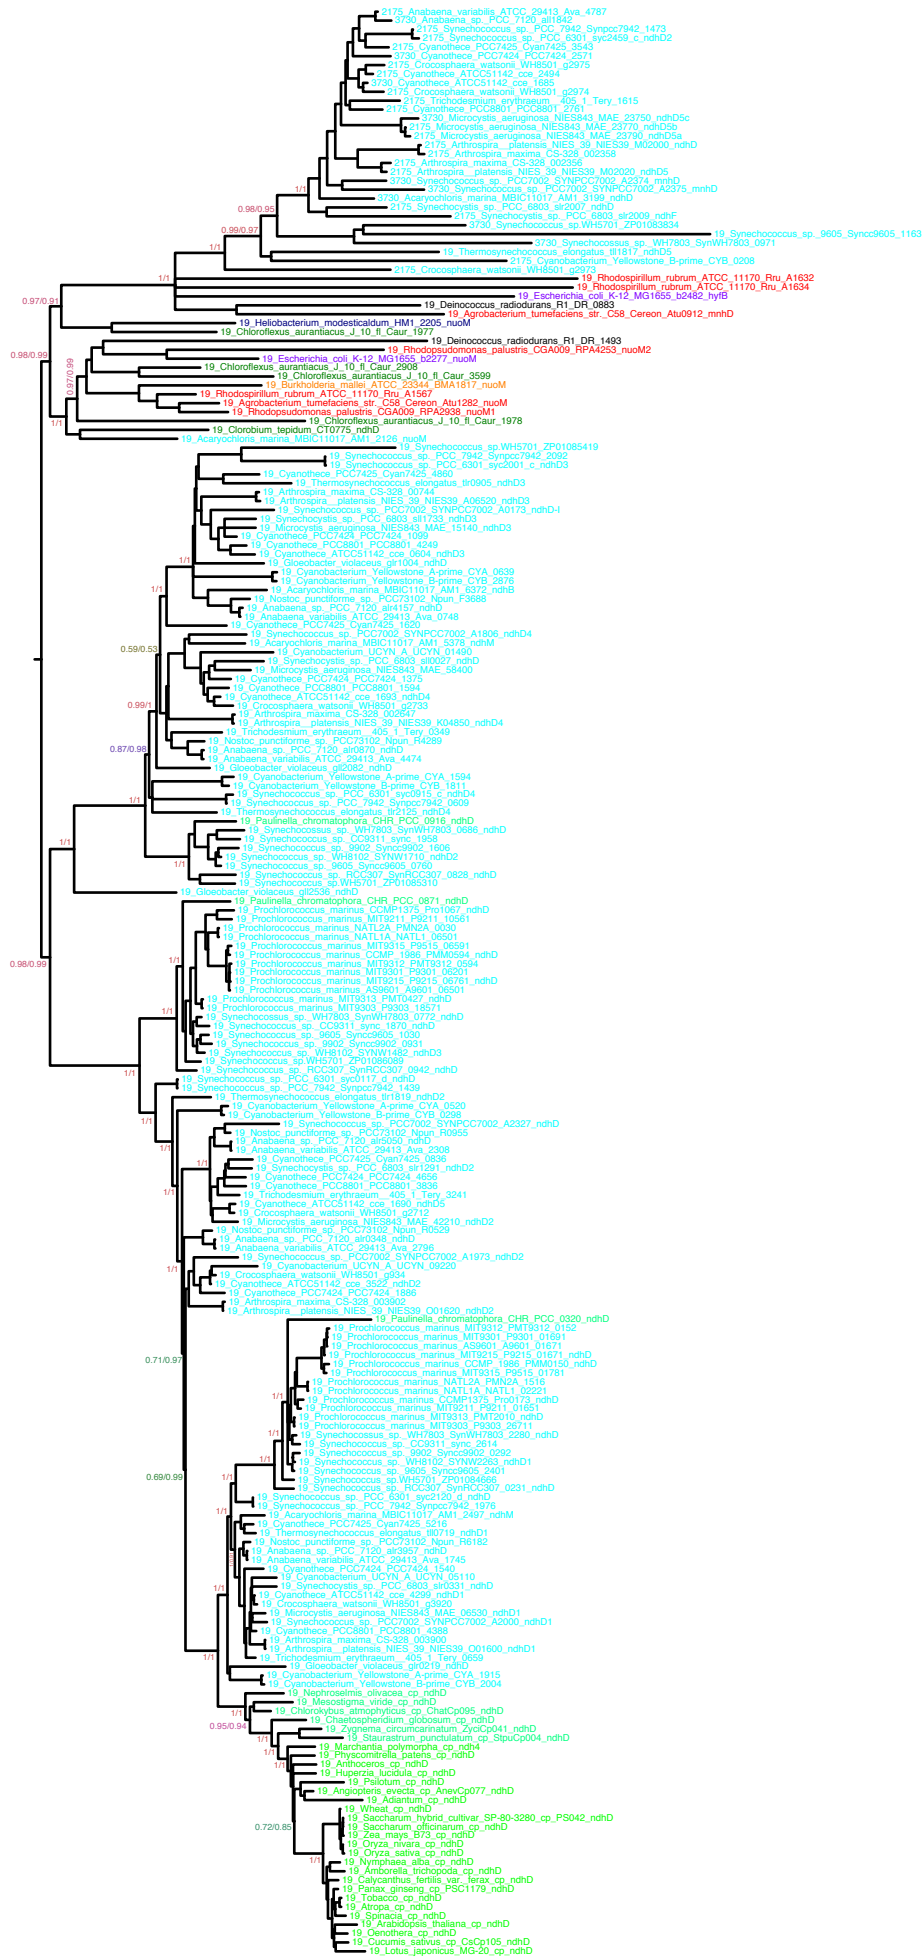

NdhJ  
(BI/ML)

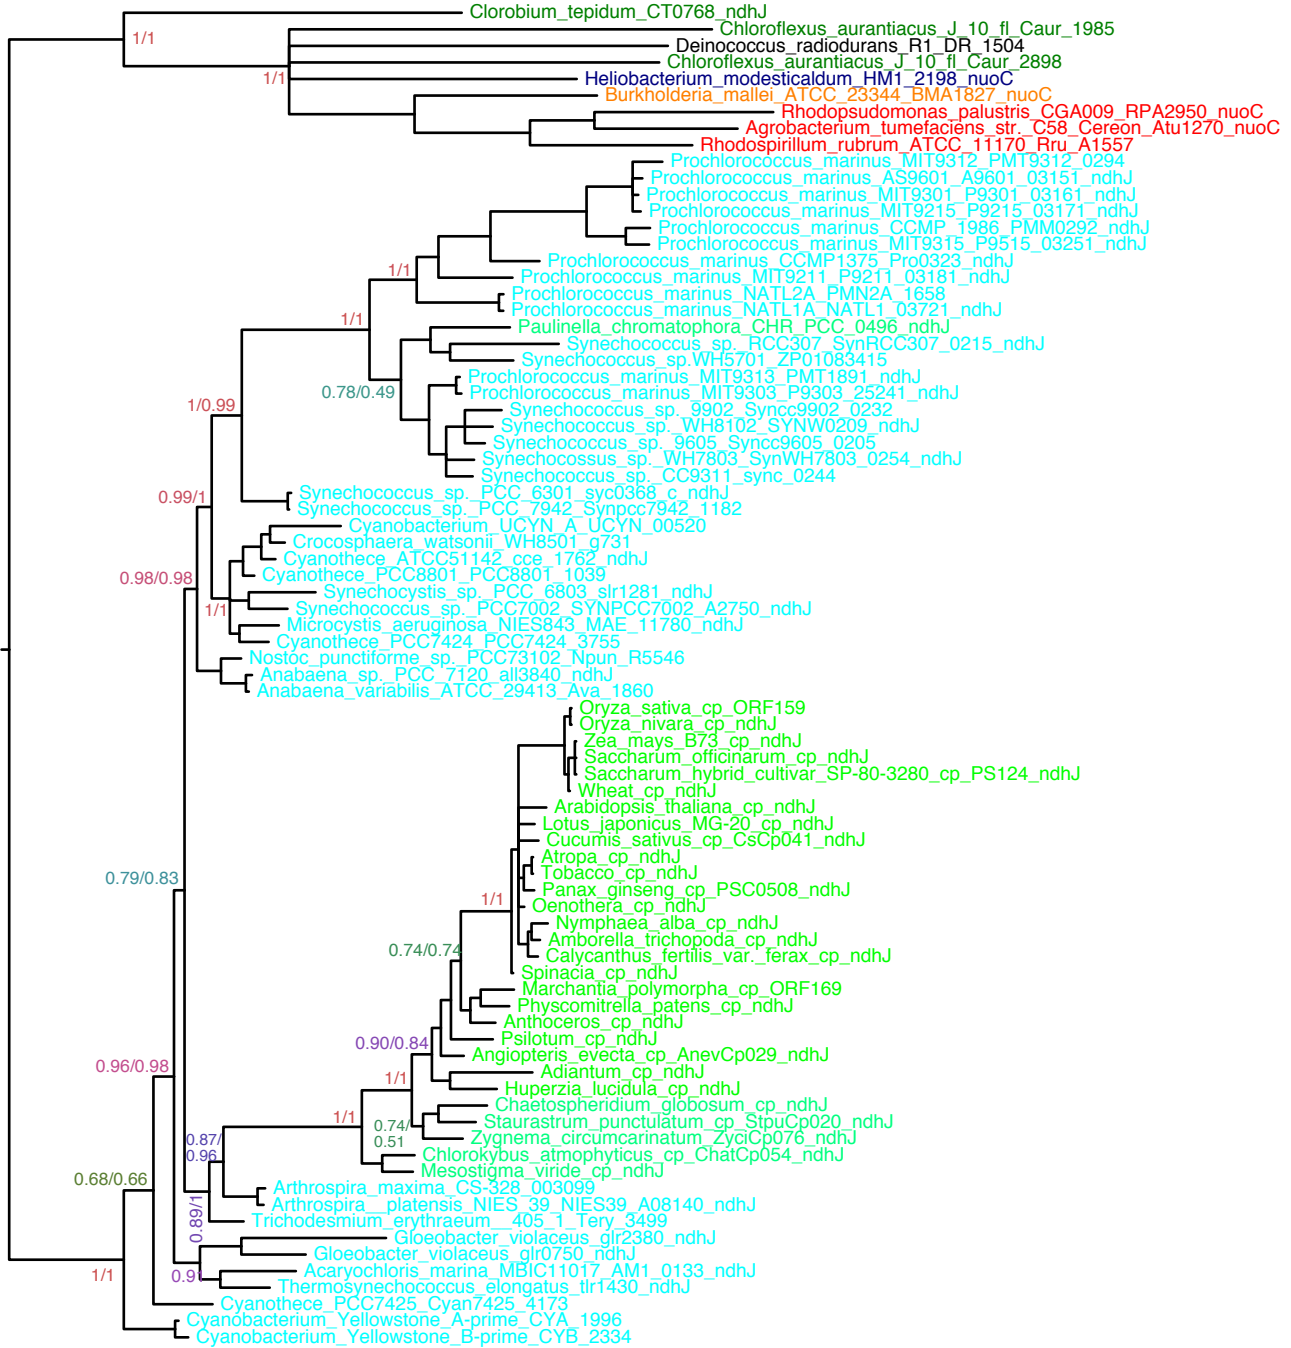

Supplement: 10265_2019_1157_MOESM5_ESM.pdf [file 10265_2019_1157_MOESM5_ESM.pdf]
