# Supplementary material for: Complex origins of chloroplast membranes with photosynthetic machineries: multiple transfers of genes from divergent organisms at different times or a single endosymbiotic event?
Source: PubMed Central journal article supplement (PMC6946739; doi:10.1007/s10265-019-01157-z), 2019-12-06

## **Journal of Plant Research**

### **Online Resources**

Complex origins of chloroplast membranes with photosynthetic machineries: Multiple transfers of genes from divergent organisms at different times or a single endosymbiotic event?

Naoki Sato

University of Tokyo

naokisat@bio.c.u-tokyo.ac.jp

### **Online Resource 6. Phylogenetic trees of Calvin-Benson Cycle enzymes.**

GAPDH, glyceraldehyde 3-phosphate dehydrogenase; PGK, phosphoglycerate kinase; PRK, phosphoribulokinase; RPE, ribose phosphate epimerase; TKL, transketolase. Locate the enzymes in the metabolic pathway in [Fig. 3](#). Other chloroplast enzymes of Calvin-Benson Cycle are originated from eukaryotes, but not prokaryotes ([Matsuzaki et al. 2004](#)), and are not analyzed in the present study.

# GAPDH (prokaryotic) (BI/ML)

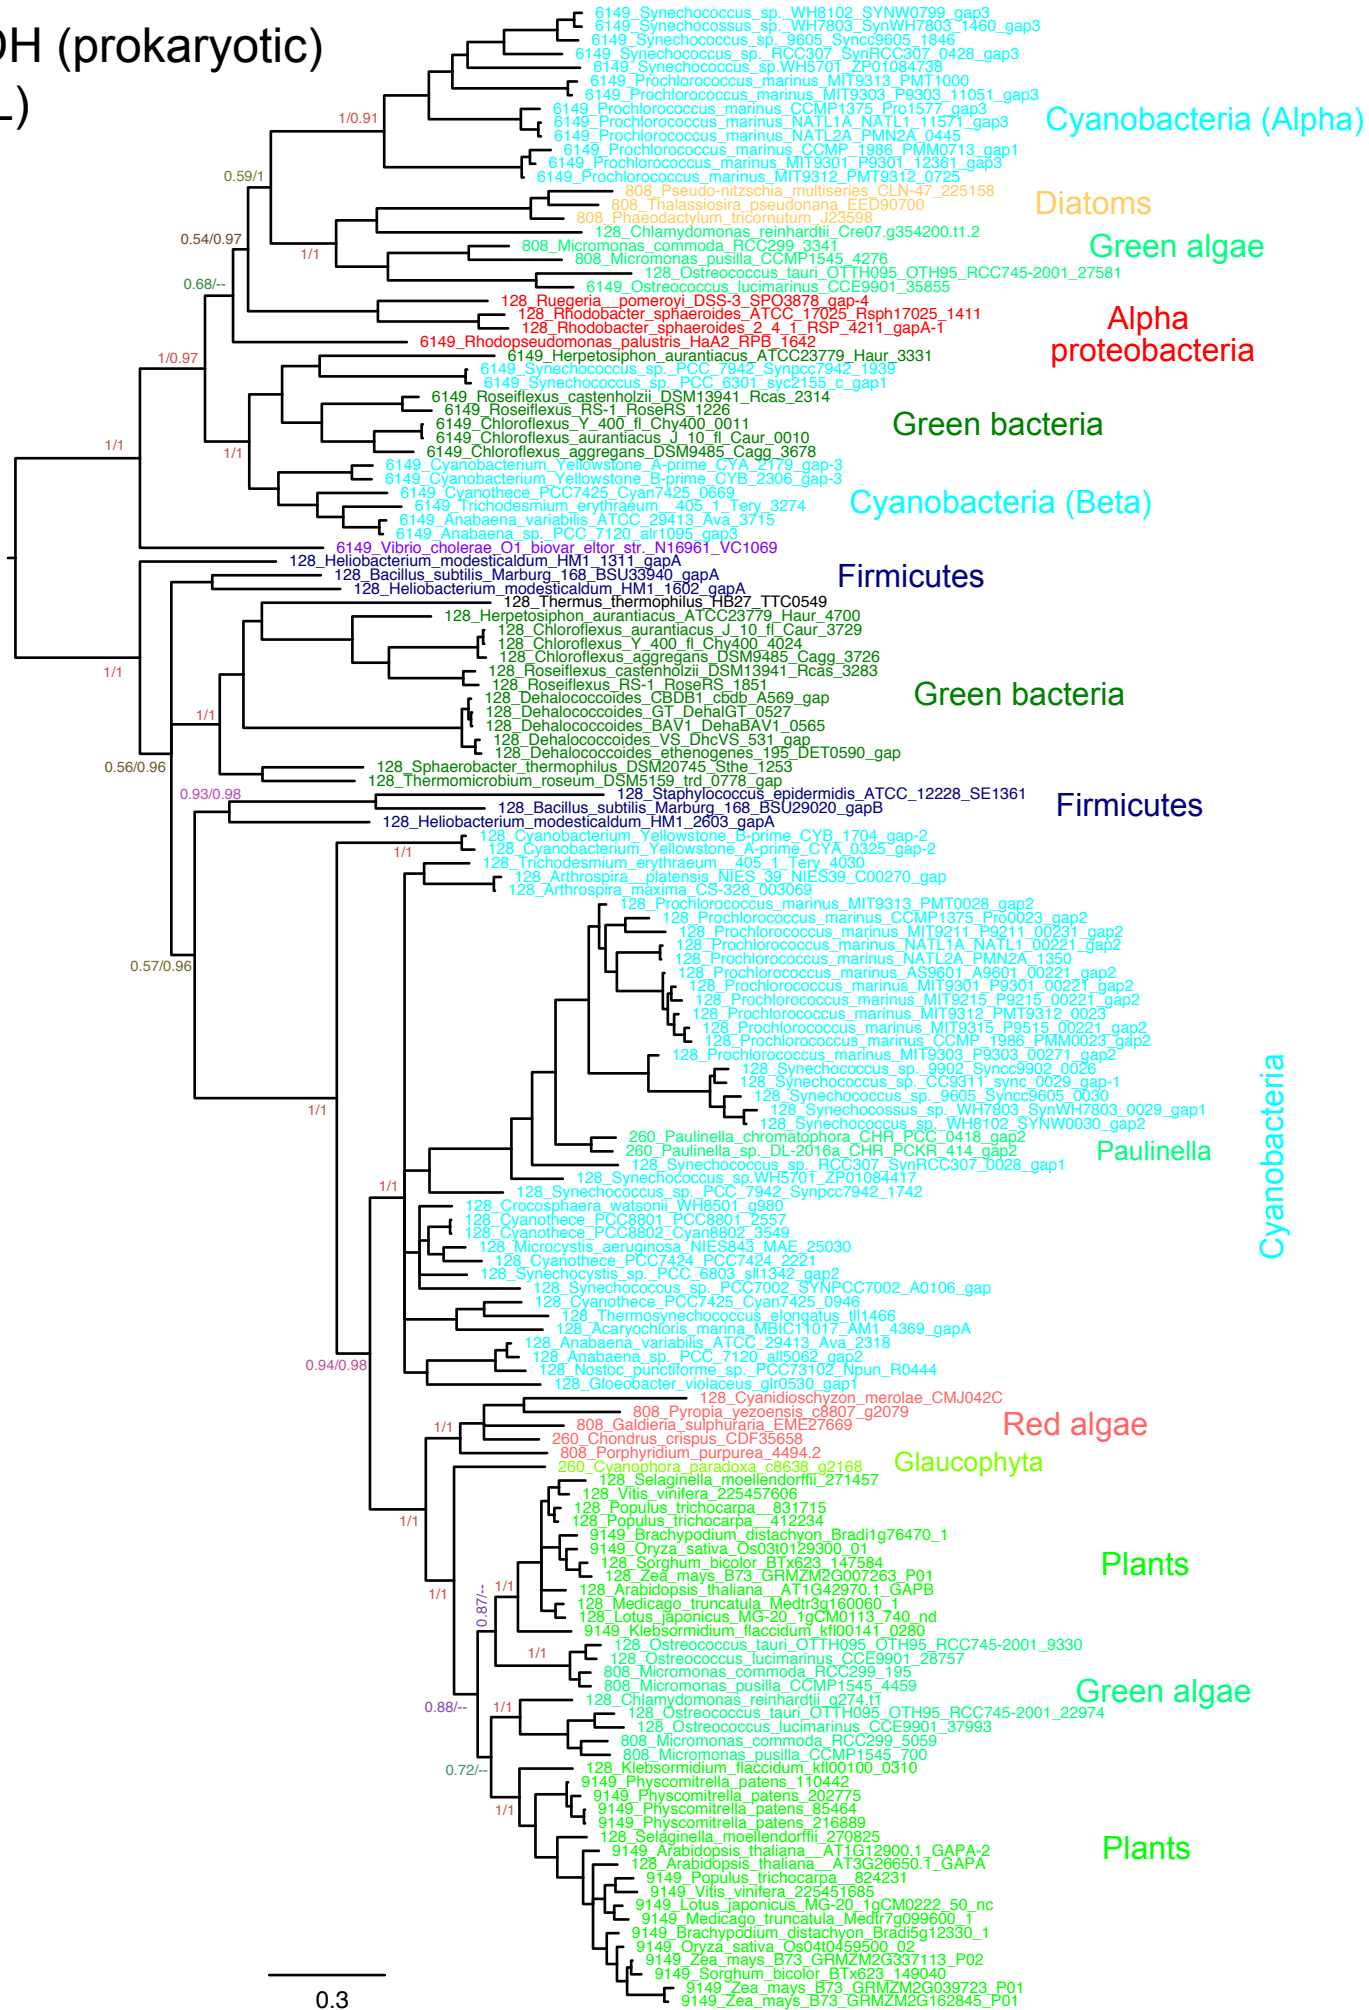

PGK  
(BI/ML)

Prokaryotic PGK

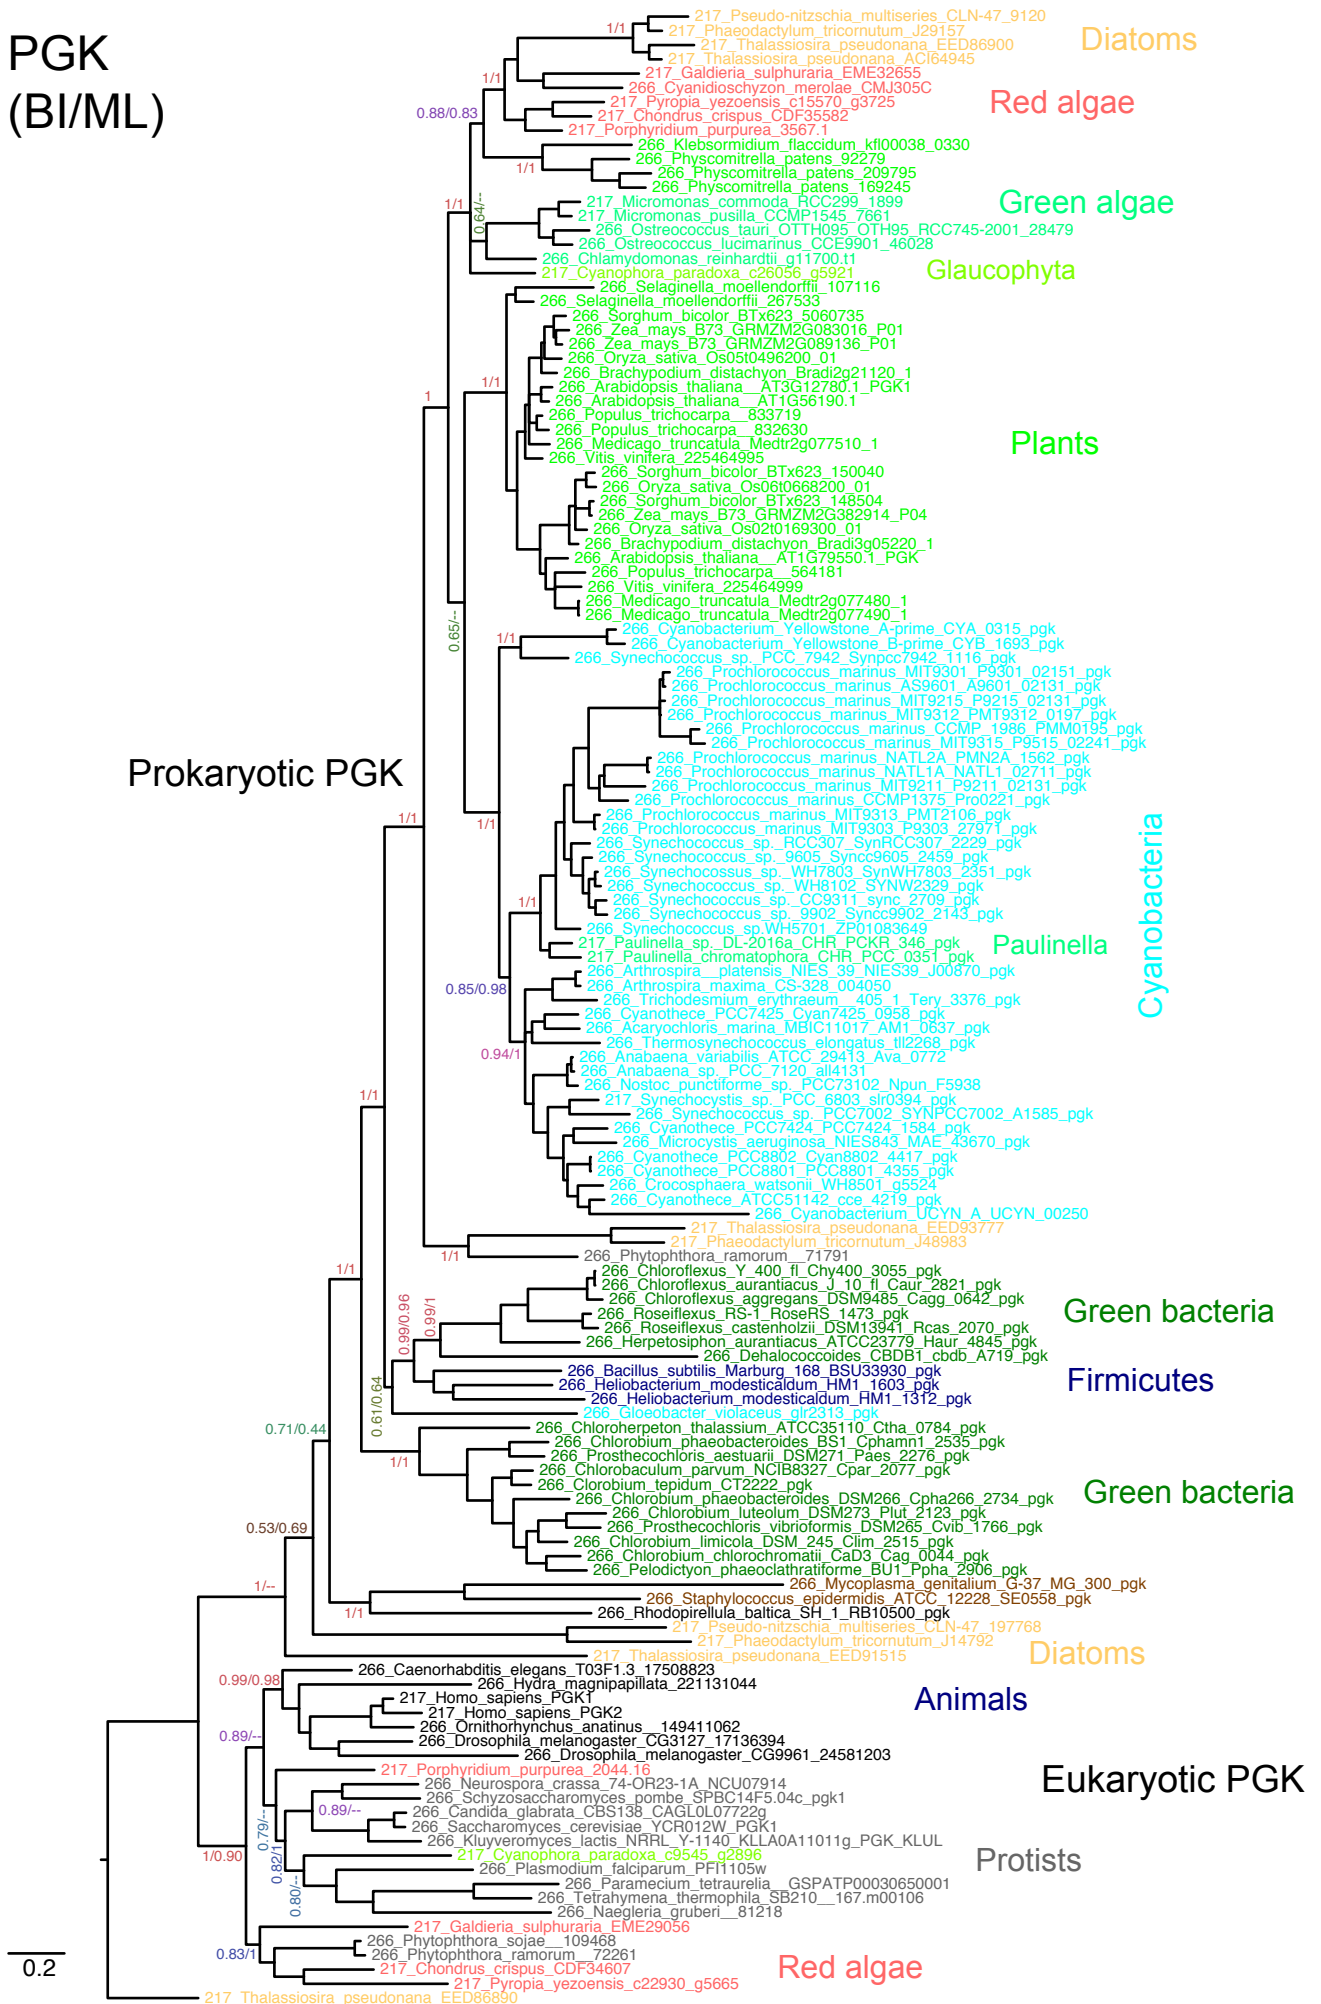

PRK  
(BI/ML)

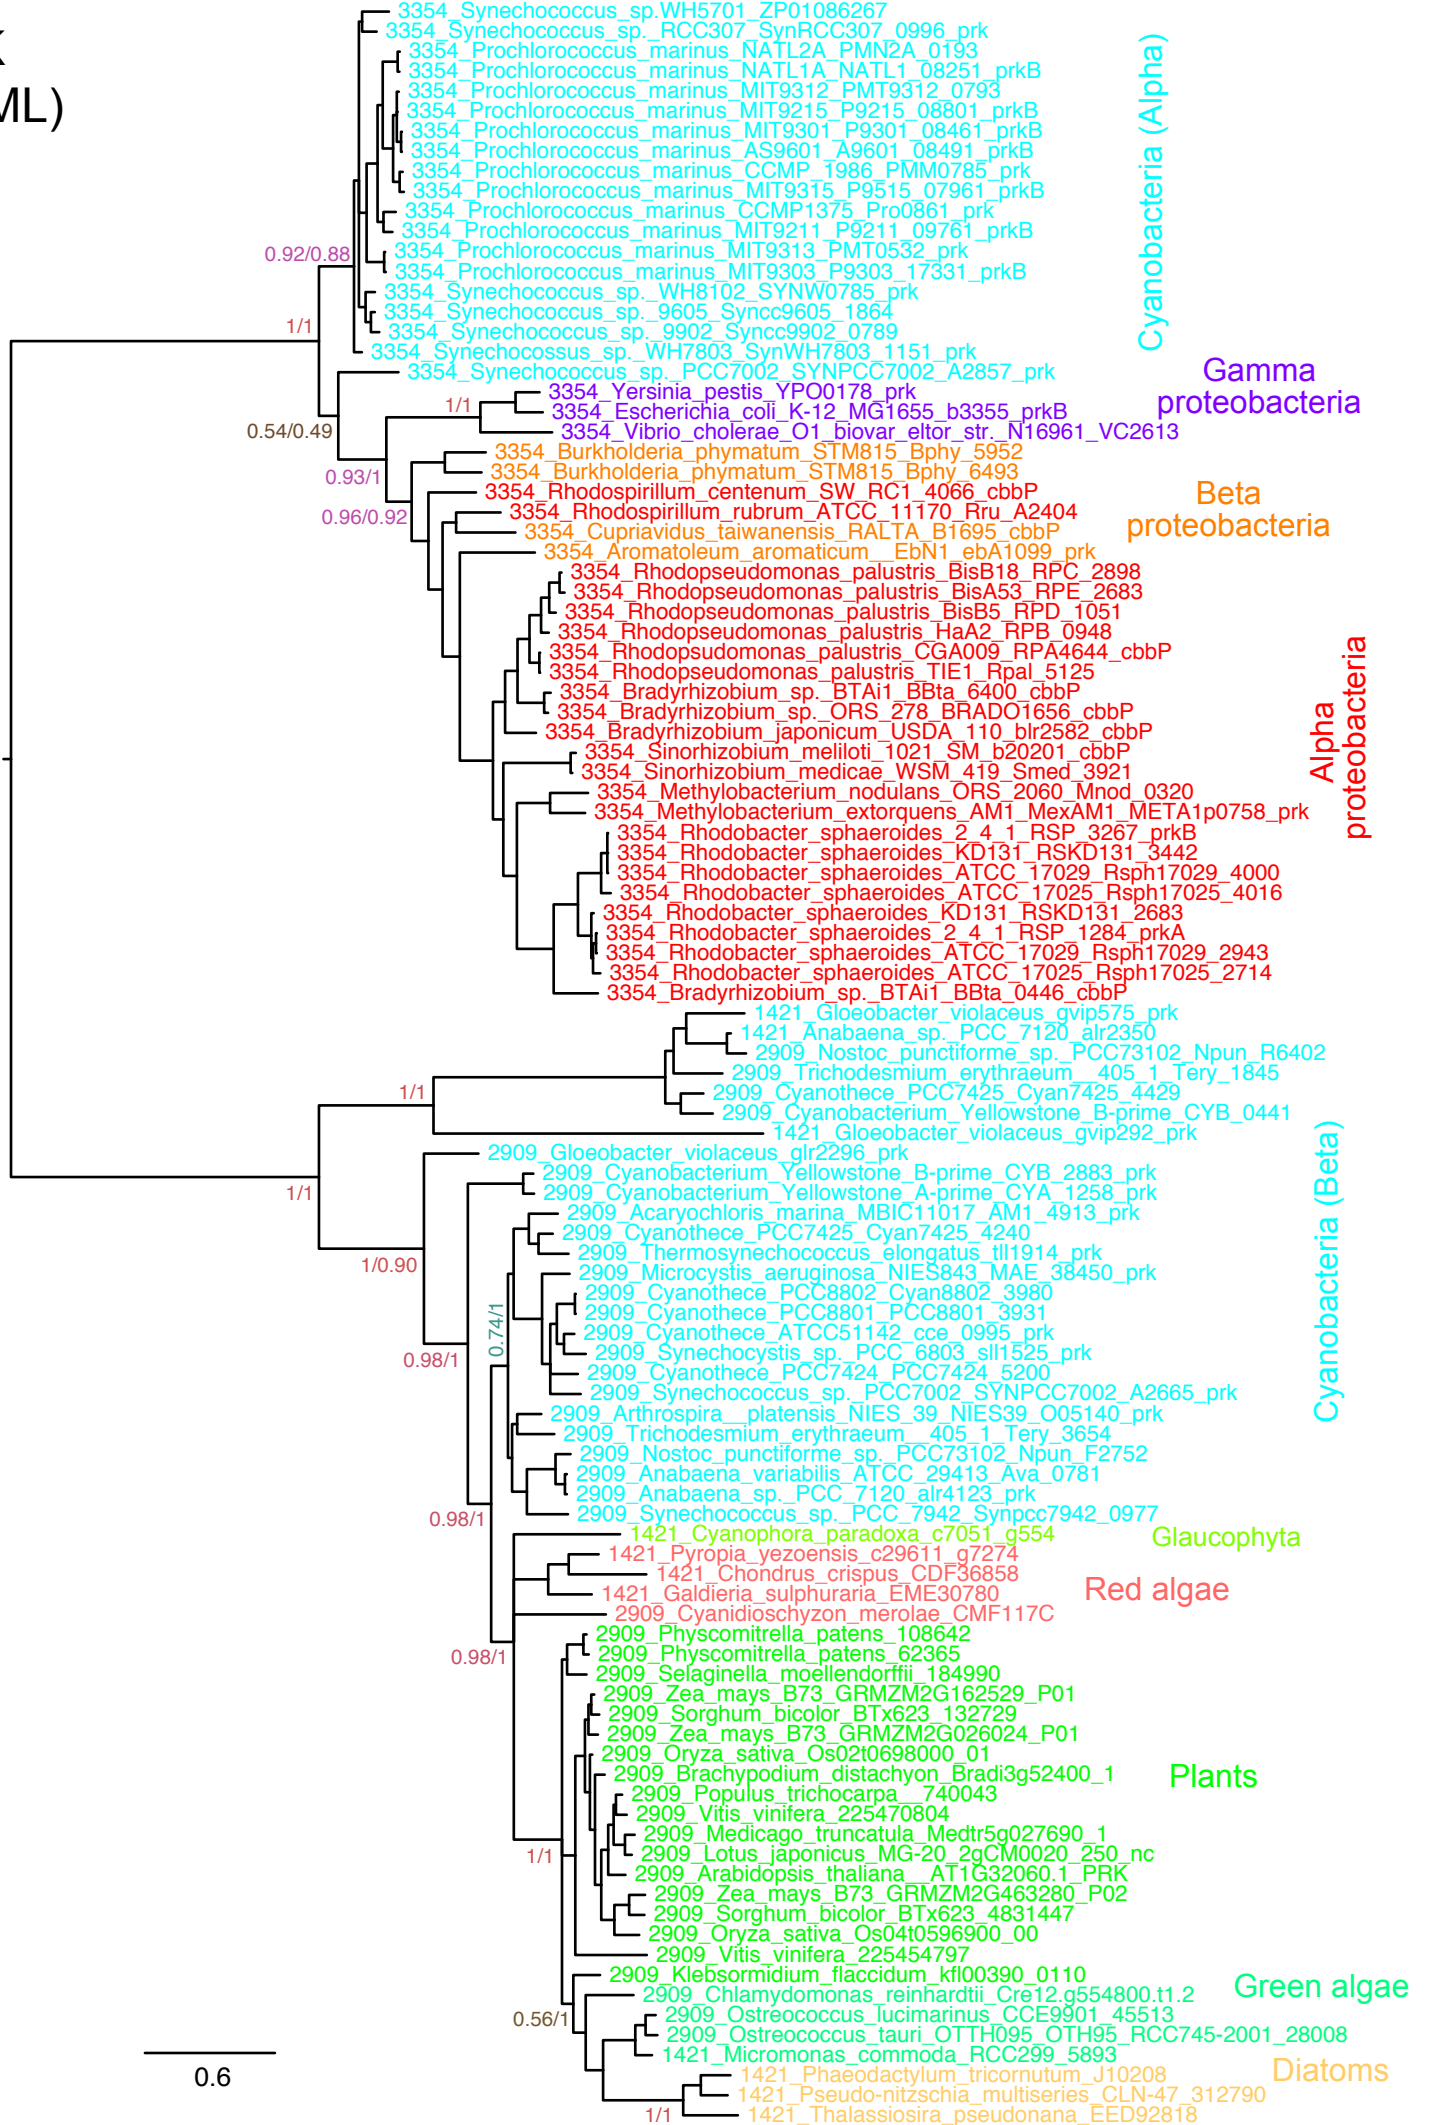

RPE  
(BI/ML)

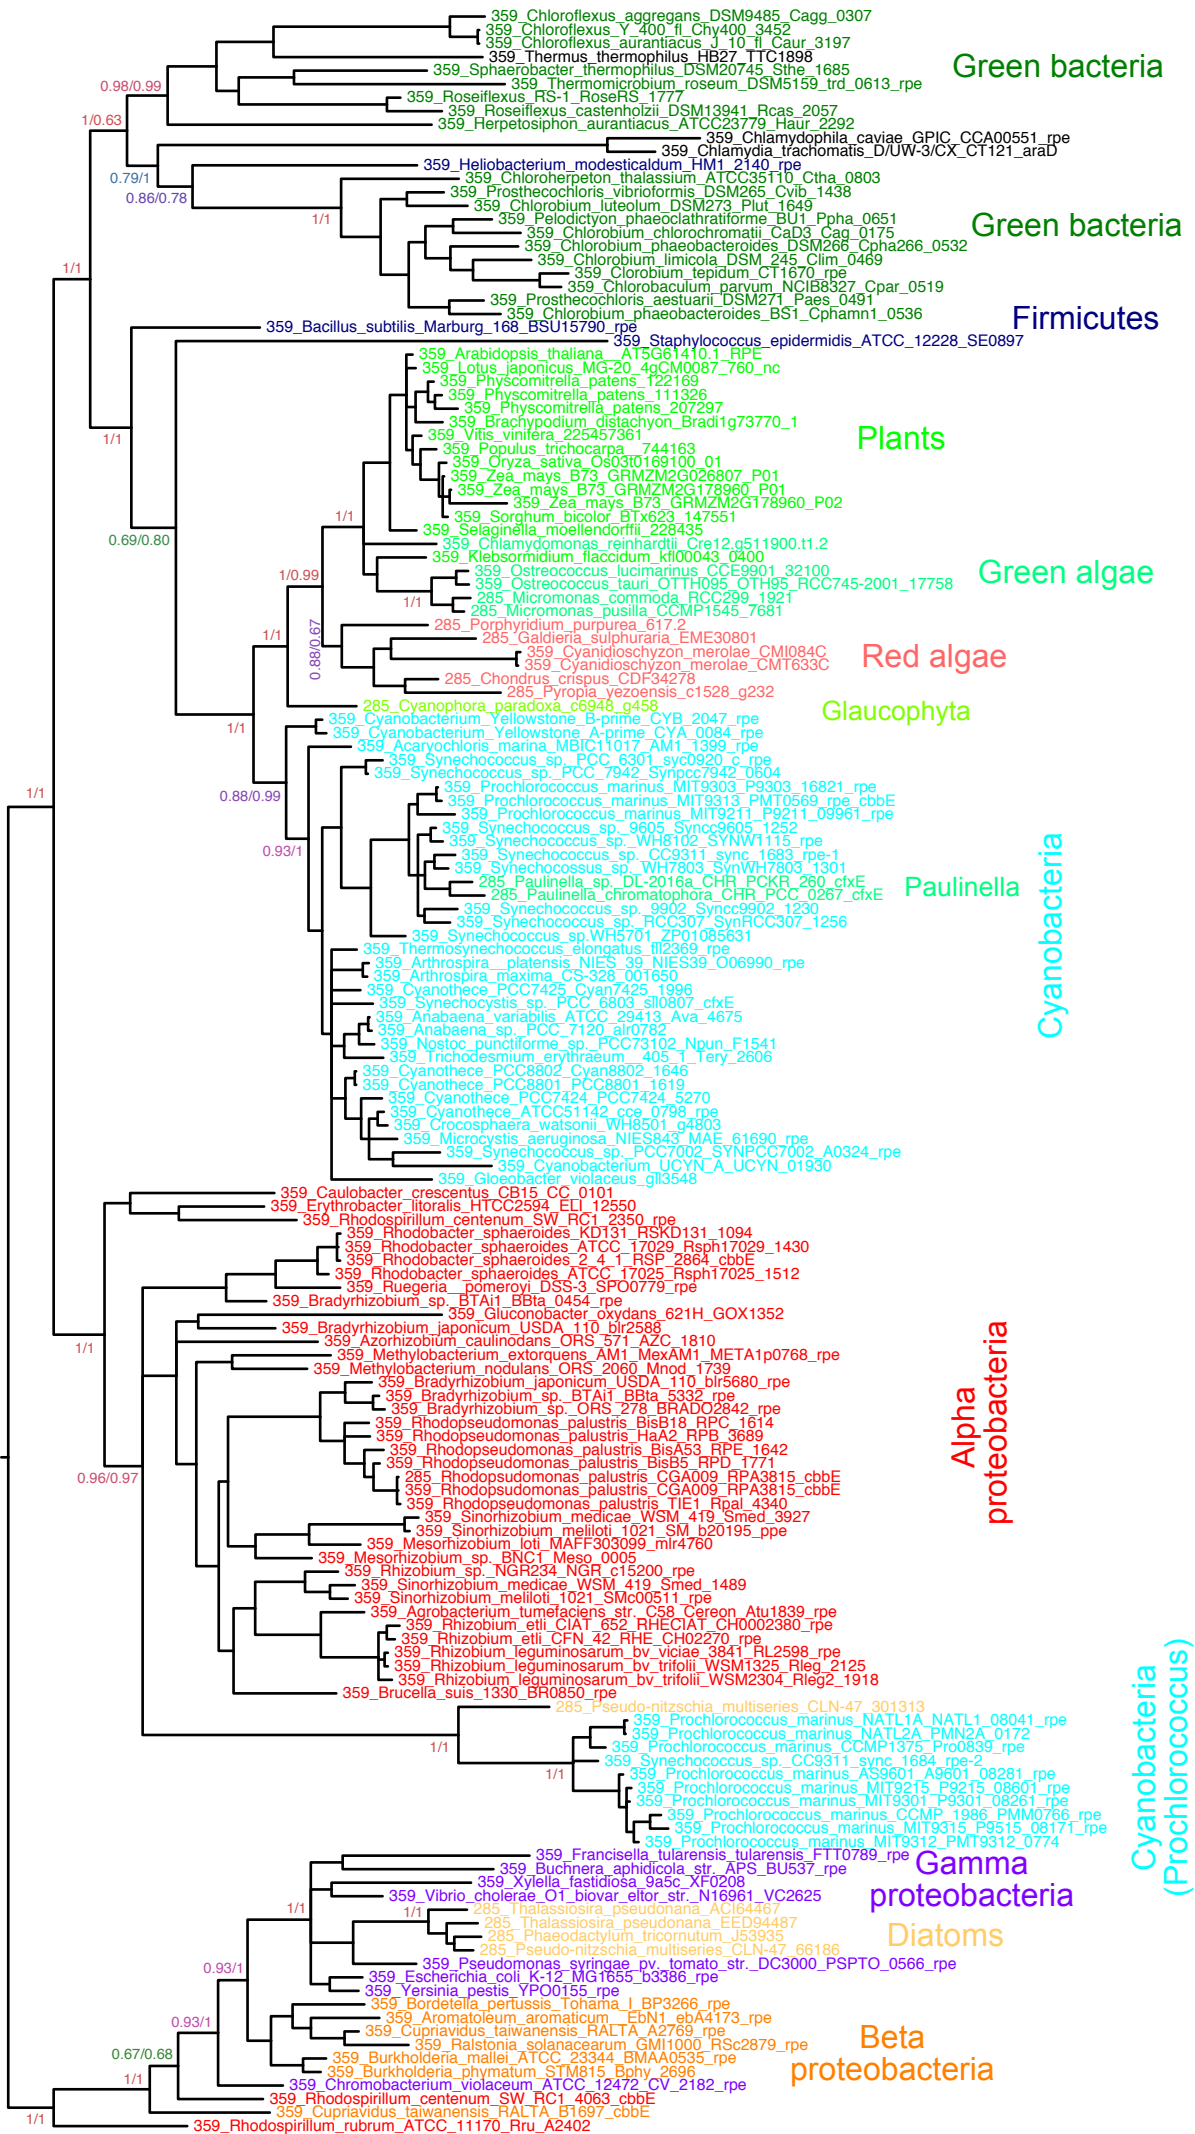

0.4

# TKL (BI/ML)

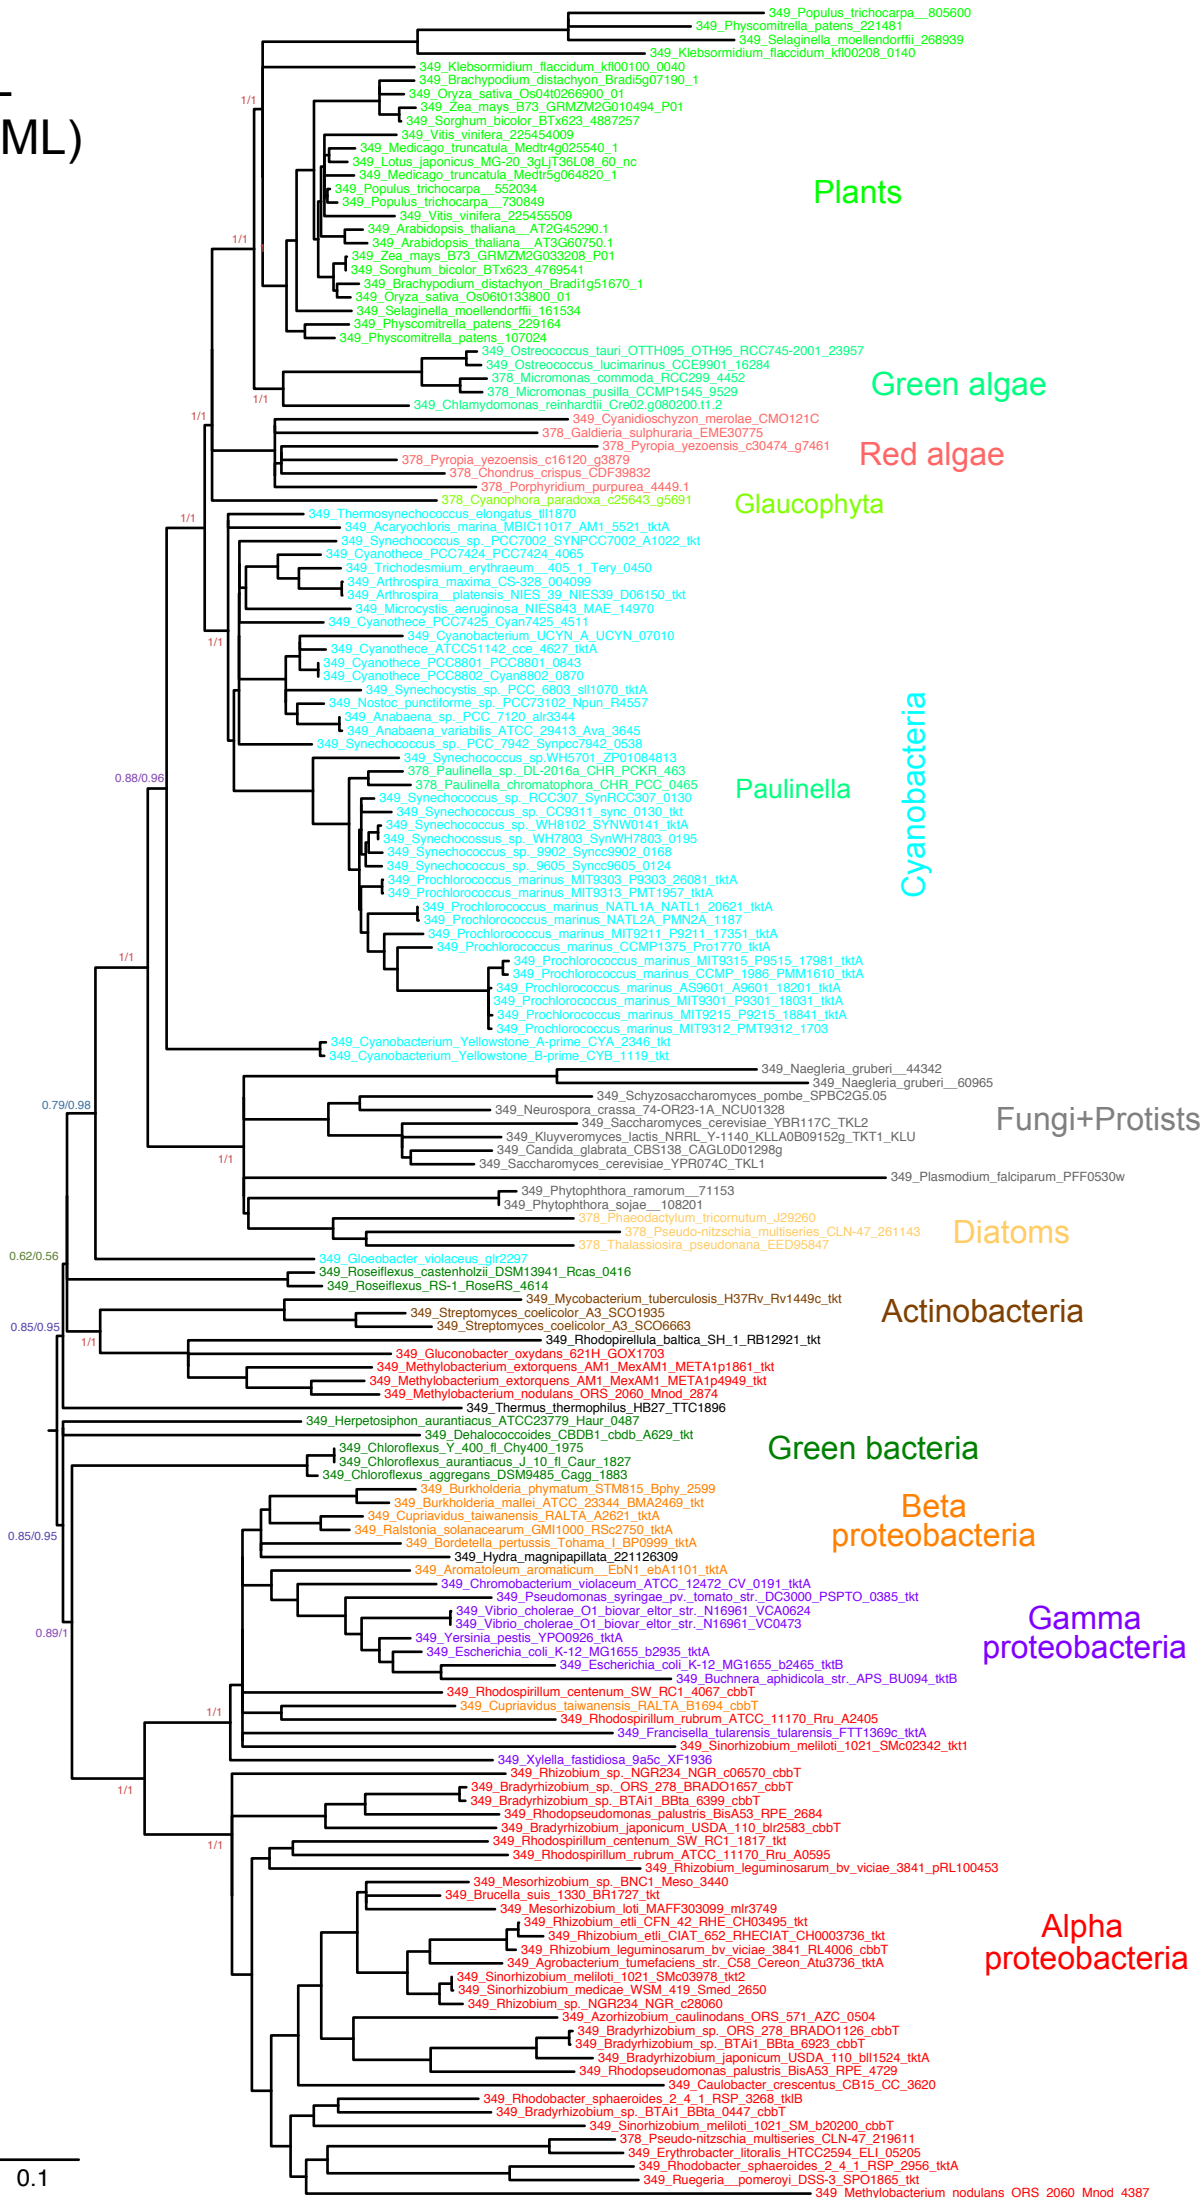

Supplement: 10265_2019_1157_MOESM6_ESM.pdf [file 10265_2019_1157_MOESM6_ESM.pdf]
