# Supplementary material for: Complex origins of chloroplast membranes with photosynthetic machineries: multiple transfers of genes from divergent organisms at different times or a single endosymbiotic event?
Source: PubMed Central journal article supplement (PMC6946739; doi:10.1007/s10265-019-01157-z), 2019-12-06

## **Journal of Plant Research**

### **Online Resources**

Complex origins of chloroplast membranes with photosynthetic machineries: Multiple transfers of genes from divergent organisms at different times or a single endosymbiotic event?

Naoki Sato

University of Tokyo

naokisat@bio.c.u-tokyo.ac.jp

### **Online Resource 7. Phylogenetic trees of proteins involved in other functions.**

This PDF includes phylogenetic trees of the proteins involved in chloroplast division, FtsZ, MinD, and MinE, and a translocon component Tic20/Ycf60.

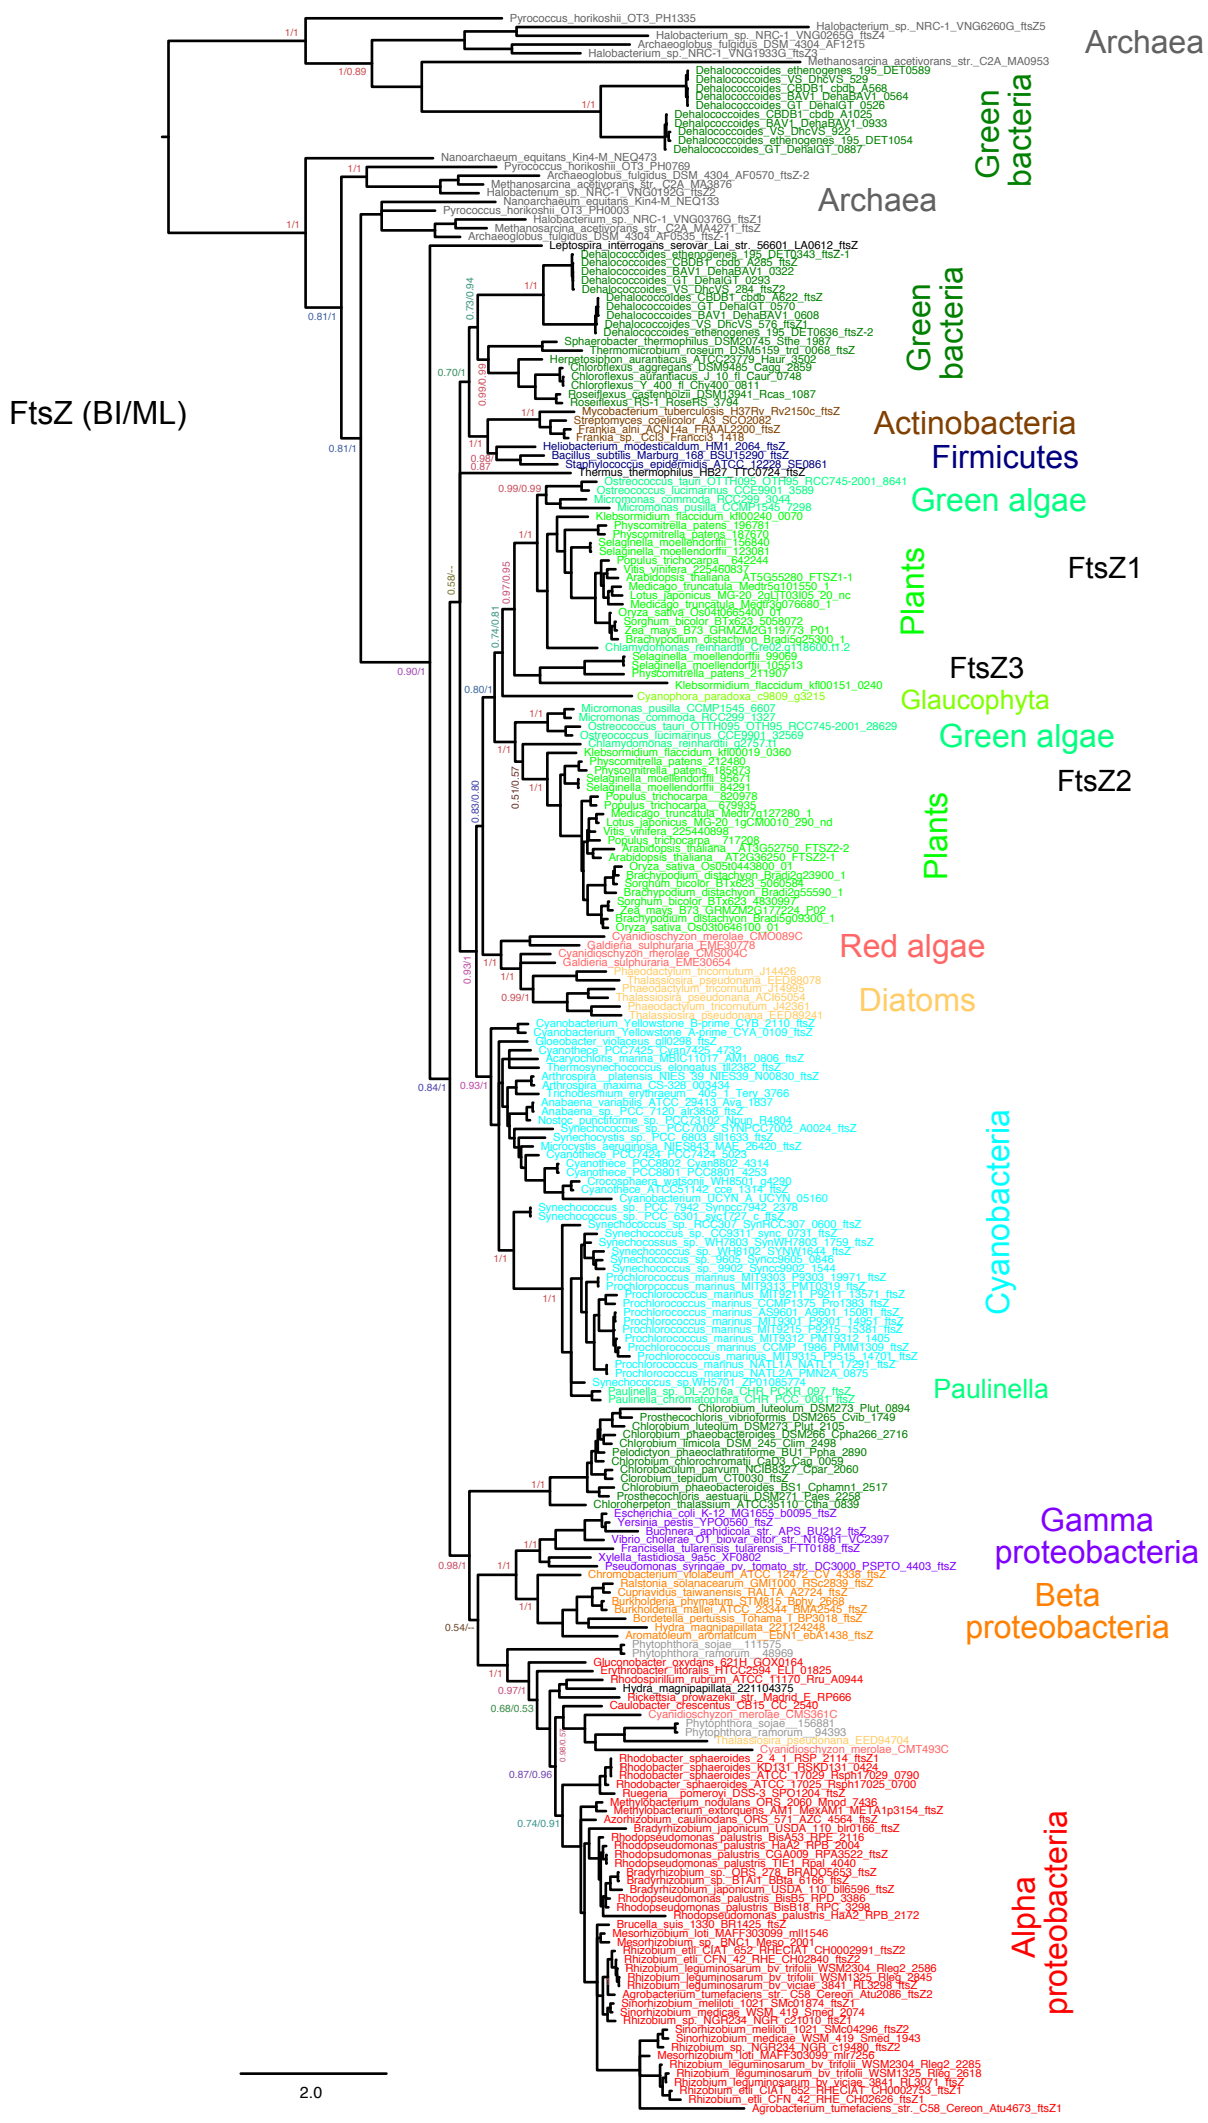



MinE  
(BI/ML)

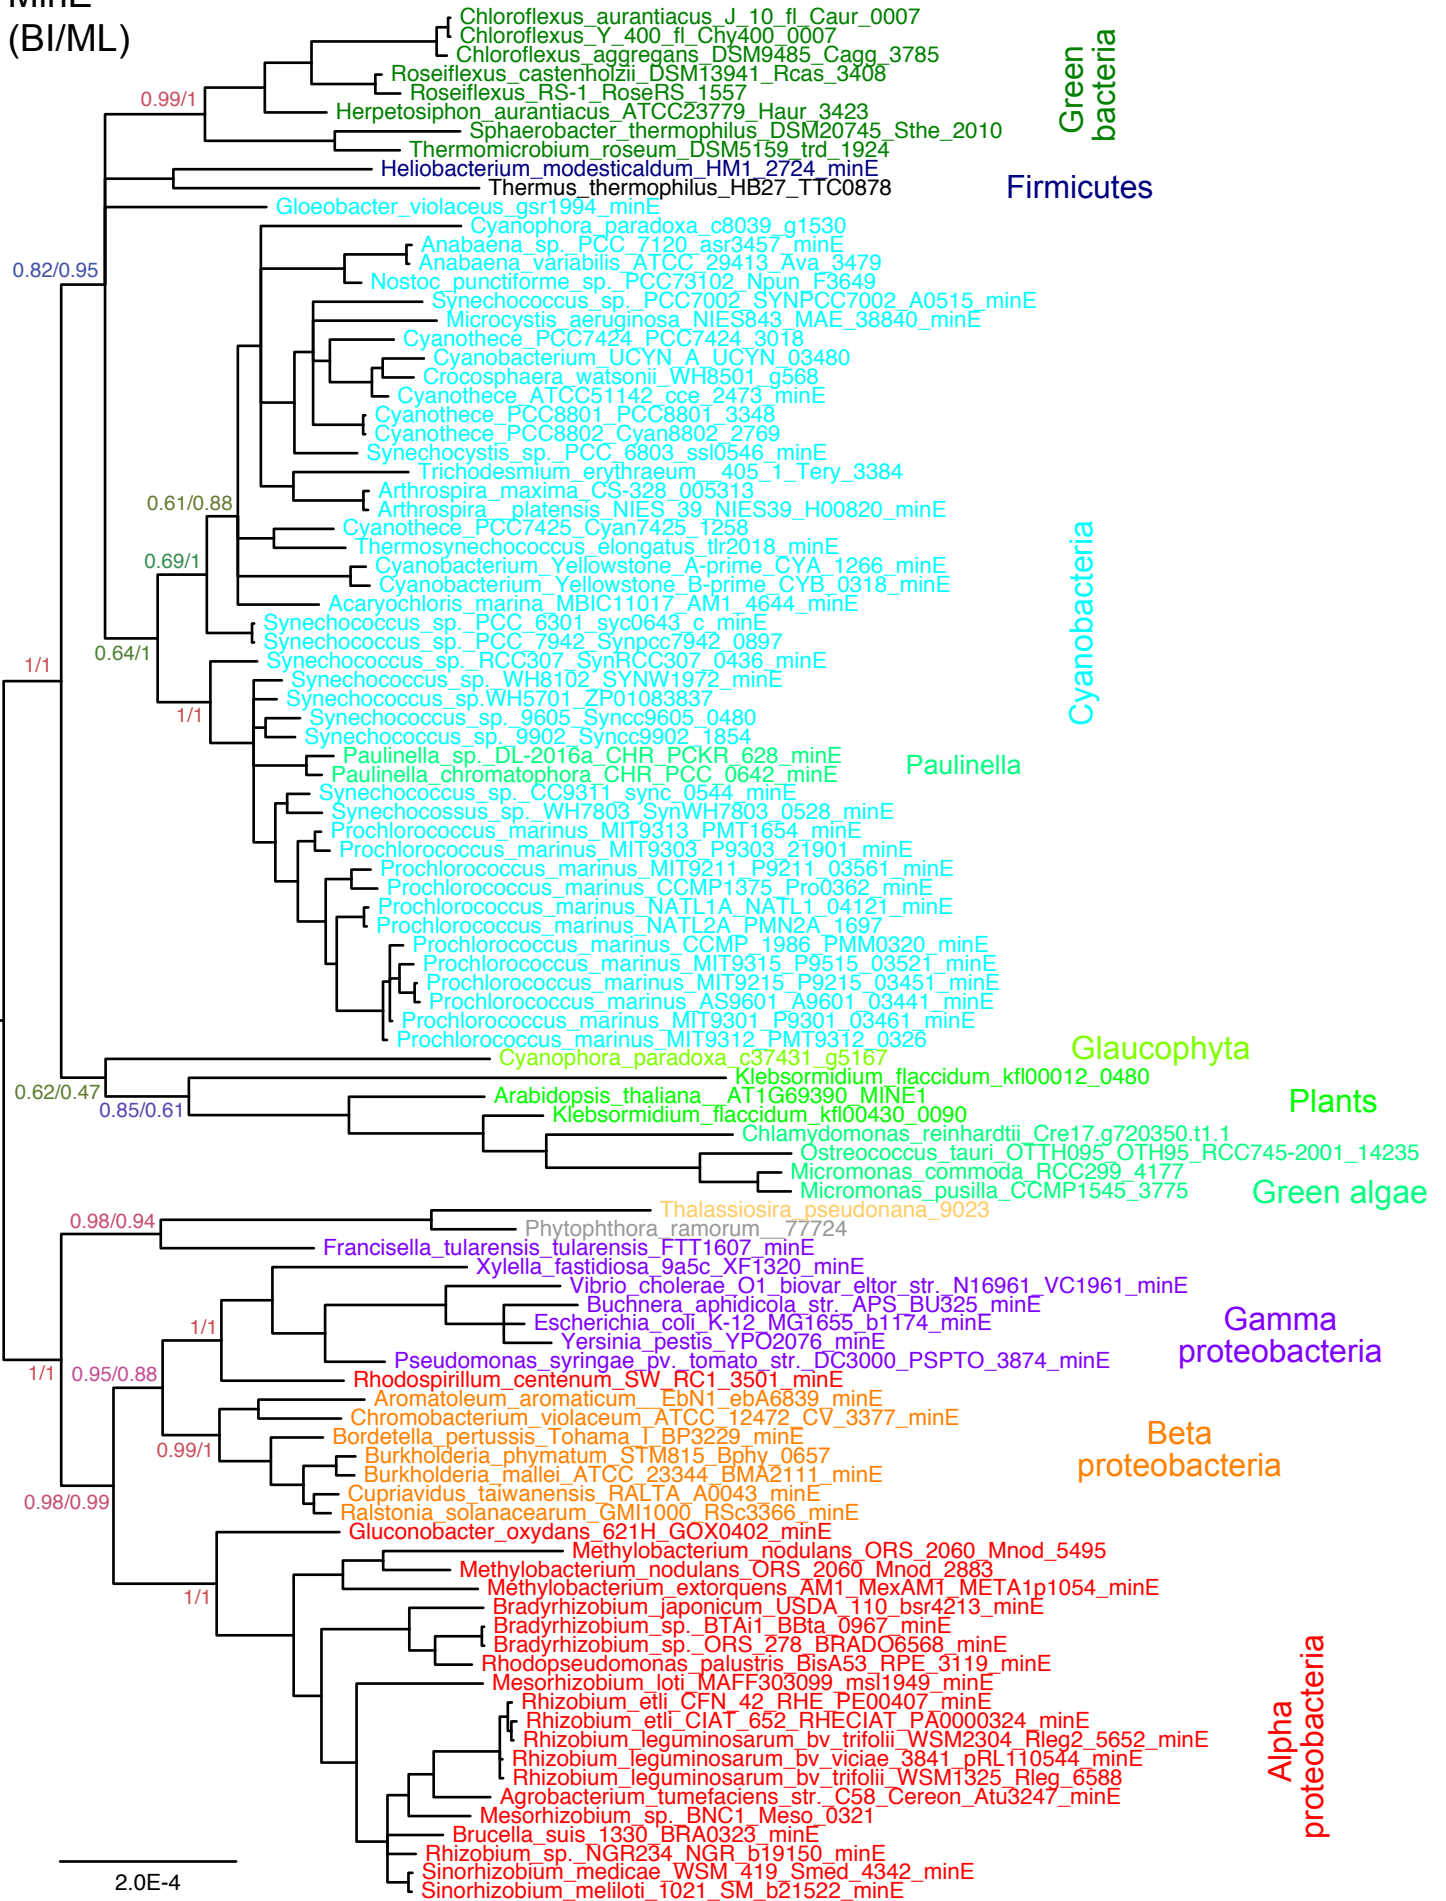

Supplement: 10265_2019_1157_MOESM7_ESM.pdf [file 10265_2019_1157_MOESM7_ESM.pdf]
